1     **Effectiveness of micromorphy against drilling predation: Insights from early Miocene**  
2                                     **faunal assemblage of Quilon limestone, India**

3                     Debarati Chattopadhyay<sup>1</sup>, K. S. Venu gopal<sup>1</sup>, Devapriya Chattopadhyay\*<sup>1, 2</sup>

4

5     <sup>1</sup>- Indian Institute of Science Education and Research (IISER) Kolkata, Department of Earth  
6     Sciences, Mohanpur, WB-741246, INDIA

7     <sup>2</sup>- IISER Pune, Earth and Climate Science, Dr. Homi Bhaba Road, Pune - 411008, INDIA

8

9

10    \* Corresponding author

11    E-mail: [devapriya@iiserpune.ac.in](mailto:devapriya@iiserpune.ac.in)

12

13

14    Keywords: Body size, drilling predation, macrobenthos, microbivalve, size refugia.

## 15 **Abstract**

16           The nature of drilling predation, although well documented for molluscan fossils, is  
17 understudied for micromolluscs (<5mm). Studying predation in micromolluscs is especially  
18 critical in evaluating the adaptive significance of micromorphy against predation and  
19 assessing the importance of predator-prey size relationship (PPSR). This study documents  
20 drilling predation event in microbivalves from early Miocene (Burdigalian) fossil assemblage  
21 of Quilon limestone from Kerala, India. Our sample of ~2000 valves represent nine families  
22 with an average drilling frequency (DF) of 0.06 and an incomplete drilling frequency (IDF)  
23 of 0.26. The characteristic drillhole morphology and occurrence of five genera of modern  
24 drilling gastropods (Naticid: *Natica*, *Tanea* and *Polinices*; Muricid: *Triplex* and  
25 *Dermomurex*) from the same locality reveals the predator identity. Predation in the studied  
26 assemblage is found to be highly selective in terms of prey taxa, size, mobility and site  
27 selection. Six out of nine families show evidence of predation indicating taxon selectivity.  
28 Poor correlation between DF and abundance further supports this view. Failed attacks are  
29 strongly correlated with morphological features such as surface ornamentation (Lucinidae),  
30 presence of conchiolin layers (Corbulidae). Drilling occurs primarily on medium size class  
31 and prey outside this size range show lower rate of attack. This indicates the existence of an  
32 “inverse size refugia” for extremely small prey along with the classical size refugia existing  
33 for large prey. Mobility is found to be a deterrent to drilling predation and it also increases  
34 failure.

35           Microbenthos of Quilon limestone shows a lower predation intensity in comparison  
36 to the Miocene macrobenthos worldwide including coeval formation of the Kutch Basin. The  
37 interaction in microbenthos is more strongly size-dependent in contrast to the Kutch fauna.  
38 Reduced predation intensity in microfauna and existence of “inverse size refugia” support the

39 claim of micromorphy acting as a defense mechanism and highlights the role of size-  
40 dependent predation in marine benthos.

41

## 42 **Introduction**

43 Predation is considered as one of the primary ecological processes that drives natural  
44 selection [1-3]. Predator-prey interactions are inherently dependent on size [4]. Consequently,  
45 body size of interacting predator and their prey are one of the vital predictors in controlling  
46 the feeding relationship within food web [5-7]. Based on global data on body size, Brose et al  
47 (2006) suggested that predator-prey size relationships (PPSRs) may systematically differ  
48 among habitats, such as terrestrial and marine [8]. The nature of PPSRs of marine  
49 invertebrates in deep time is especially interesting because of its impact on major  
50 evolutionary breakthrough driven by predation [1].

51 Drilling predation is one of the unique scenarios where the signature of the predatory  
52 event is preserved and various aspects of predator-prey dynamics can be reconstructed by  
53 evaluating non-random attacks based on species identity, ecological character, and size of the  
54 prey (see [9] for review). Such records are found in the recent [10-13] as well as in the fossil  
55 ecosystems dating as far back as Cambrian. The predation intensity varied during  
56 Phanerozoic, often in sync with diversity [14] and shows a significant increase from Late  
57 Mesozoic with the appearance of two modern predatory gastropod families, namely Muricid  
58 and Naticid [9, 15, 16].

59 It has long been recognized that predators are generally larger than their prey [17, but  
60 see 18], especially in highly size-structured marine ecosystem [19-21]. Size selectivity is  
61 largely true for drilling predator-prey system [22- 24] with some exceptions [25]. The prey  
62 selection by a drilling predator is a balance between invested energy (through foraging,  
63 drilling and consumption) and energy gain (dependent on prey size) [22, 26]. As predator size

64 increases, metabolic demand becomes more resulting in an increase in the rate of food intake  
65 to match the energetic demands [27]. Such increase in energy requirement can be tackled by  
66 choosing either a larger prey or attacking multiple smaller preys; the decision depends on the  
67 availability and distribution of prey-size in a community [28]. Prey often develops anti-  
68 predatory strategies as a response to an increase in predation pressure. Increase in effective  
69 size and attaining a “size refugia” is one of the common anti-predatory strategies exploited by  
70 marine invertebrates [29-33]. Such “size refugia” is often a result of handling limit of the  
71 predator [22]. Interestingly, prey smaller than the “size refugia” are not always attacked with  
72 equal frequency. It has been observed that the medium size class are often attacked the most,  
73 making them the preferred size class for predation [13, 25]. This points to an apparent  
74 predation-resistance of extremely small sized prey. If the attacks on extremely small prey  
75 significantly reduces the net energy gain of the predator, it would be expected to find a low  
76 predation pressure in smaller sized prey [27]. This may lead to an “inverse size refugia” in  
77 the smaller size class and shield the extremely small prey from predation. Harper and Peck  
78 [34] also demonstrated low intensity of durophagous predation in tropical brachiopods and  
79 attributed the micromorphic nature of tropical brachiopods as a defense against durophagous  
80 predation. Unfortunately, the drilling predation dynamics in juveniles and extremely small  
81 molluscan prey are rarely studied and hence, not well understood to test the existence of  
82 predation resistance in smaller prey.

83         The Quilon limestone of early Miocene, exposed in southern state of Kerala, India  
84 preserves a molluscan assemblage, dominated by bivalves and gastropods. This fauna is  
85 characterized by extremely small size (<5mm) in comparison to the bivalve fauna of coeval  
86 Chhasra formation of the Kutch Basin, India representing the same biogeographic province  
87 namely Western Indian Province (WIP) [35]. Both of these fauna displays abundance of

88 predatory drillholes. Using these two fauna, we attempted to evaluate predator-prey dynamics  
89 in extremely small size class, addressing the following questions:

- 90 i. What is the nature of prey-predator dynamics (in terms of prey selectivity, size  
91 selectivity, site selectivity) in the extreme size class?
- 92 ii. Does the micromorphy provide any adaptive advantage against drilling  
93 predation?

94

## 95 **Materials and methods**

### 96 **Geological setting and collection**

97 All the specimens are collected from an extended cliff section of Asthamudi Lake (N  
98 08°58'36", E 076°38'08") near Padapakkara village, Kerala, India (Fig 1). It corresponds to  
99 the Quilon limestone outcrop studied by Dey [36], Menon [37,38], and Reuter et al [39]. This  
100 unit is represented by fossiliferous hard greenish limestone and interpreted as a seagrass  
101 habitat of Burdigalian (early Miocene) age [39]. The diverse fauna shows exquisite  
102 preservation of various invertebrate groups (including gastropod, bivalves, cephalopod,  
103 scaphopod, ostracodes, foraminifera and crabs) and dominated by individuals of small body  
104 size (<5 mm). Bulk sample was collected from the vertical face of the exposure.

105

106 **Fig 1.** Map of Indian subcontinent with the Kerala and the Kutch Basin demarcated by a star  
107 and a circle respectively (inset). The detailed map of studied locality with exposures of  
108 Quilon limestone. The locality of collection is marked by a star.

109

110 Bulk sample of loose sediments (~230gm) were soaked for 2-3 days in normal water.  
111 Repeated heating and thawing was used to separate specimens from the limestone matrix.

112 The processed samples were then sieved using a stacked sieve of five mesh sizes (63, 60, 35,  
113 25, 18 $\mu$ m). Sediments below 25 $\mu$ m sieve size did not contain any fossil. A total of 2032 intact  
114 bivalve specimens were studied under microscope and identified upto family level. Using the  
115 digitized images, the specimens were measured with the help of Image J. We measured all  
116 drilled specimens and 20 random undrilled specimens from each of the family for size  
117 analysis (Data File S1). We used SEM image to document representative specimens. We also  
118 compared our data with previously published predation data from the bivalve fauna of coeval  
119 formations including Chhasra formation of Kutch, India [25] (Fig 1).

120

## 121 **Analysis**

122 Using the standard criteria for identifying predatory drillhole [16], we identified the  
123 predatory drillholes. We also found a few very small, cylindrical drillholes. The morphology  
124 of these drillholes is significantly different from the predatory drilling and hence, excluded  
125 from our analysis. We considered families that are represented by more than ten individuals  
126 for this study.

127 Because all the bivalve specimens in our collection are disarticulated valves, drilling  
128 frequency (DF) was calculated by dividing the number of drilled valves by the half of total  
129 number of valves in the collection [40].

$$130 \quad \text{Drilling frequency (DF)} = N_D / (N * 0.5)$$

131 Where

132  $N_D$  = number of valves with complete drillhole

133  $N$  = total number of valves.

134 The incomplete drilling frequency (IDF) was calculated by dividing the total number  
135 of incompletely drilled valves by the total number of drilled valves (complete and  
136 incomplete) present in the collection [25].

137 Incomplete drilling frequency (IDF) =  $N_{ID} / (N_{ID} + N_D)$

138 Where

139  $N_{ID}$  = number of valves with incomplete drillhole

140  $N_D$  = number of valves with complete drillhole.

141 Because there is no incidence of multiple drillholes for single specimen in our  
142 specimens, the calculated IDF is comparable to prey effectiveness (PE) proposed by Vermeij  
143 [1].

144 To reconstruct the predator size from a drill hole, we used following formulas  
145 proposed for Naticid [22] and Muricid [24] gastropods.

146 For Naticid,  $\log(Y_{nat}) = -0.372 + 0.552 (\log X_{nat})$

147 Where

148  $Y_{nat}$  = Drillhole diameter

149  $X_{nat}$  = Predator size

150

151 For Muricid,  $\log_e(Y_{mur}) = 0.82 \log_e(X_{mur}) - 2.46$

152 Where,

153  $Y_{mur}$  = Maximum outer diameter of the drillhole

154  $X_{mur}$  = Maximum predator size.

155 We found it difficult to follow the standard protocols using sector grids [41] to assign  
156 location of the drillhole in the small specimens of the studied fauna. Instead, we divided each  
157 valve into three concentric regions (umbonal, middle and edge) and assigned the locations to  
158 the drillholes. The division of the sites was maintained consistently for all the drilled  
159 specimens.

160 We used Mann-Whitney U-test to compare response (in terms of size, drilling  
161 frequency) between various groups based on species identity, ecological character. To

162 compare between different ecological groups and different size classes (small, medium,  
163 large) we used Chi<sup>2</sup> test. To compare the size distribution of various categories (i.e. drilled,  
164 undrilled), we used Kolmogorov-Smirnov (K-S) test. To assess the relationship between  
165 predator and prey size, we used Pearson correlation test. All the analysis is done on R  
166 software [42].

167

## 168 Results

### 169 Predation intensity and success

170 A total of 2032 valves represent nine families of bivalves, dominated by Cardiidae  
171 (Fig 2, Fig 3A). A total of 62 valves show drillholes representing six families; Arcidae,  
172 Veneridae and Tellinidae does not have any drilled individuals (Table 1). The pooled DF is  
173 0.06 and IDF is 0.25. We did not find incidence of multiple drillhole in any specimen. The  
174 majority of the drillholes are created by Naticid gastropods (84%).

175

176 **Fig 2.** SEM pictures of the drilled bivalve families of Kerala, India. Complete drillholes are  
177 present in Cardiidae (A), Corbulidae (B), Glycymerididae (C), Cardiidae (D), Lucinidae (E),  
178 Anomidae (F) and incomplete drillhole on Lucinidae (G), Corbulidae (H).

179

180 **Table 1.** Taxonomic summary of drill hole data with ecological information of Kerala, India.

181

| Family     | Abundance | Undrilled | Complete Drill holes | Drill holes at umbo | Drill holes at middle | Drill holes at edge | Naticid | Muricid | Incomplete Drill holes | DF   | IDF  | Substrate | Mobility |
|------------|-----------|-----------|----------------------|---------------------|-----------------------|---------------------|---------|---------|------------------------|------|------|-----------|----------|
| Corbulidae | 271       | 246       | 16                   | 1                   | 12                    | 3                   | 9       | 7       | 9                      | 0.12 | 0.36 | Infaunal  | Immobile |
| Veneridae  | 147       | 147       | 0                    | 0                   | 0                     | 0                   | 0       | 0       | 0                      | 0    | -    | Infaunal  | Mobile   |



|                |      |      |    |   |    |    |    |    |    |      |      |           |          |
|----------------|------|------|----|---|----|----|----|----|----|------|------|-----------|----------|
| Cardiidae      | 1298 | 1264 | 34 | 1 | 28 | 5  | 32 | 2  | 0  | 0.05 | 0    | Infaunal  | Mobile   |
| Tellinidae     | 23   | 23   | 0  | 0 | 0  | 0  | 0  | 0  | 0  | 0    | -    | Infaunal  | Mobile   |
| Lucinidae      | 181  | 164  | 5  | 1 | 3  | 1  | 4  | 1  | 12 | 0.06 | 0.71 | Infaunal  | Mobile   |
| Anomidae       | 47   | 43   | 4  | 3 | 0  | 1  | 4  | 0  | 0  | 0.17 | 0    | Epifaunal | Immobile |
| Arcidae        | 34   | 34   | 0  | 0 | 0  | 0  | 0  | 0  | 0  | 0    | -    | Epifaunal | Mobile   |
| Glycymerididae | 29   | 27   | 2  | 1 | 0  | 1  | 2  | 0  | 0  | 0.14 | 0    | Infaunal  | Mobile   |
| Overall        | 2030 | 1948 | 61 | 7 | 43 | 11 | 51 | 10 | 21 | 0.06 | 0.26 | -         | -        |

182

183

184 The relative abundance of prey family varies and is not showing any control on DF or  
 185 IDF (Fig 3A-C). DF and IDF vary significantly between families (Fig 3B, C). Anomidae  
 186 shows highest DF (0.17) followed by Glycymerididae, Corbulidae, Lucinidae and Cardiidae  
 187 (Table 1). Lucinidae shows highest incidence of incomplete drillholes (0.7) followed by  
 188 Corbulidae.

189 Majority of the drillholes are located in the middle (71%), followed by edge drilling  
 190 (18%) and umbonal drilling (11%) (Table 1). Except for Anomidae and Glycymerididae, all  
 191 the families show rarity of umbonal and edge drilling (Fig 3D).

192

193 **Fig 3.** Plots showing families in the studied assemblage with their individual abundance (A);  
 194 drilling frequency (DF) (B); incomplete drilling frequency (IDF) (C) and site selectivity (D).

195

196 We did not find any significant difference in DF or IDF between infauna and epifauna  
 197 (Fig 4; Table 2). However, the families with incomplete drilling are all infaunal. All the  
 198 complete drillholes in epifaunals are created by Naticids; Muricid drillings are observed only  
 199 on infaunals (Fig 4A; Table 2). DF is significantly higher in immobile families and IDF in

200 mobile families (Fig 4B; Table 2). Naticid drillings are significantly higher in mobile families  
 201 and Muricids drillings in immobile families (Table 2).

202

203 **Fig 4.** Barplots showing pooled drilling frequency (DF) for various ecological groups based  
 204 on their substrate relationship (A) and mobility (B).

205

206 **Table 2.** Results of Chi<sup>2</sup> test to evaluate the difference in DF between various ecological  
 207 groups. Significant results are in bold.

|          | Undrilled valves | Drilled valves | Chi <sup>2</sup> | P        | Complete drillhole | Incomplete drillhole | Chi <sup>2</sup> | P        | Naticid drillhole | Muricid drillhole | Chi <sup>2</sup> | P            |
|----------|------------------|----------------|------------------|----------|--------------------|----------------------|------------------|----------|-------------------|-------------------|------------------|--------------|
| Infauna  | 1871             | 78             | 0.18             | 0.67     | 57                 | 21                   | 1.45             | 0.23     | 47                | 10                | 0.84             | 0.36         |
| Epifauna | 77               | 4              |                  |          | 4                  | 0                    |                  |          | 4                 | 0                 |                  |              |
| Mobile   | 289              | 29             | <b>25.1</b>      | <b>0</b> | 20                 | 9                    | <b>14.6</b>      | <b>0</b> | 38                | 3                 | <b>7.52</b>      | <b>0.006</b> |
| Immobile | 1659             | 53             |                  |          | 41                 | 0                    |                  |          | 13                | 7                 |                  |              |

208

209

## 210 Size selectivity

211 We found a significant difference in size distribution between groups with and  
 212 without drilling (complete and incomplete) (Fig 5A- C; Table 3). At the family level  
 213 analyses, three families (Anomidae, Cardiidae, Lucinidae) showed a significant difference in  
 214 size distribution between groups with and without drilling (Fig 5D- F; Table 3). Moreover,  
 215 the smaller and larger size classes showed a significantly lower incidence of drilling (Fig 6,  
 216 Table 4). The three families without any drilling (Arcidae, Veneridae and Tellinidae) show  
 217 significant difference in size distribution in comparison to pooled size distribution of all the  
 218 drilled individuals (Fig 7A-C). Individuals are significantly larger in Arcidae (K-S test  
 219 statistic D=0.57, p<0.05) than the average size of the drilled ones. Both Veneridae (K-S test

220 statistic  $D=0.54$ ,  $p<0.05$ ) and Tellinidae (K-S test statistic  $D=0.44$ ,  $p<0.05$ ) are smaller than  
 221 the drilled ones size.

222

223 **Fig 5.** Boxplot showing comparison between prey-size of drilled (complete and incomplete)  
 224 and undrilled (A); complete and incomplete (B) and undrilled and complete (C) for pooled  
 225 data. Lower panel shows the same for individual families (D-F). The boxes are defined by  
 226 25th and 75th quantiles; thick line represents median value.

227

228 **Table 3.** Results of K-S test to evaluate the difference in prey size for overall and various  
 229 families. Significant results are in bold.

|                         | Overall     |             | Anomidae   |             | Cardiidae   |             | Corbulidae |      | Glycymerididae |      | Lucinidae  |             |
|-------------------------|-------------|-------------|------------|-------------|-------------|-------------|------------|------|----------------|------|------------|-------------|
|                         | D           | p           | D          | p           | D           | p           | D          | p    | D              | p    | D          | p           |
| Drilled vs Undrilled    | <b>0.21</b> | <b>0.02</b> | <b>0.8</b> | <b>0.03</b> | <b>0.43</b> | <b>0.02</b> | 0.17       | 0.9  | 0.55           | 0.64 | 0.45       | 0.05        |
| Complete vs Incomplete  | 0.3         | 0.12        | -          | -           | -           | -           | 0.26       | 0.79 | -              | -    | 0.45       | 0.48        |
| Undrilled vs Complete   | 0.2         | 0.05        | <b>0.8</b> | <b>0.03</b> | <b>0.43</b> | <b>0.02</b> | 0.21       | 0.82 | 0.55           | 0.64 | <b>0.7</b> | <b>0.04</b> |
| Undrilled vs Incomplete | 0.26        | 0.17        | -          | -           | -           | -           | 0.2        | 0.95 | -              | -    | 0.34       | 0.4         |

230

231

232 **Fig 6.** Barplot showing the proportion of drilled valves in three different size classes- small  
 233 ( $>1\text{mm}$ ), medium (1-2mm) and Large ( $<2\text{mm}$ ).

234

235 **Table 4.** Results of  $\text{Chi}^2$  test to evaluate the difference in proportion of drilled valves in three  
 236 different size classes. Significant results are in bold.

|                         | Undrilled valves | Drilled valves | Chi <sup>2</sup> | p            |
|-------------------------|------------------|----------------|------------------|--------------|
| Small ( $>1\text{mm}$ ) | 28               | 1              | <b>10.45</b>     | <b>0.001</b> |
| Medium (1-2mm)          | 115              | 56             |                  |              |
| Large ( $<2\text{mm}$ ) | 29               | 5              | <b>4.42</b>      | <b>0.04</b>  |

237

|              |    |   |     |      |
|--------------|----|---|-----|------|
|              |    |   | 2.3 | 0.13 |
| Small (>1mm) | 28 | 1 |     |      |

238

239

240

241 **Fig 7.** Boxplot showing comparison between pooled prey-size of drilled valves in contrast to  
 242 the undrilled families including Arcidae (A), Veneridae (B) and Tellinidae (C). The boxes are  
 243 defined by 25th and 75th quantiles; thick line represents median value.

244

245 There is a significant positive correlation between prey size with OBD (and inferred  
 246 predator size) for Naticid attacks (Fig 8A, B; Table 5), but not for Muricid attacks. However,  
 247 this positive relationship does not exist for Naticid attacks on Cardiidae and Corbulidae (Fig  
 248 8C, D; Table 5). The inferred size of the Muricids is significantly larger than that of the  
 249 Naticids.

250

251 **Fig 8.** Scatterplot showing relationship between prey size and outer borehole diameter (OBD)  
 252 (A) and inferred predator size (B) for pooled data. Lower panel shows the prey-predator size  
 253 relationship for Cardiidae (C) and Corbulidae (D). The open circles represent Naticid attack  
 254 and the solid triangles represent Muricid attacks.

255

256 **Table 5.** Results of Pearson correlation test to evaluate the relationship between predator and  
 257 prey size of studied locations. Significant results are in bold.

| Location       | Relationship        | Pearson correlation coefficient | p           |
|----------------|---------------------|---------------------------------|-------------|
| Kerala_Overall | Prey size vs OBD    | <b>0.25</b>                     | <b>0.04</b> |
| Kerala_Overall | Prey- predator size | <b>0.4</b>                      | <b>0</b>    |
| Kutch_Overall  |                     | 0.12                            | 0.41        |
| Kerala_Naticid |                     | <b>0.34</b>                     | <b>0.01</b> |
| Kerala_Muricid |                     | -0.24                           | 0.51        |

|                |                                |       |   |
|----------------|--------------------------------|-------|---|
| Kerala_Naticid | prey/predator vs predator size | -0.85 | 0 |
| Kerala_Muricid |                                | -0.93 | 0 |
| Kutch_Naticid  |                                | -0.57 | 0 |

258

259

## 260 Comparison with macro fauna

261 The DF and IDF of the microscopic bivalves are significantly lower than those of  
 262 larger bivalves of Kutch (Fig 9A, B, Table 6). The site selectivity between two provinces  
 263 were also compared (Fig 9C, Table 6). In comparison to Kutch, the umbonal proportion of  
 264 drillholes is significantly lower in Kerala. Unlike Kerala, Kutch fauna shows complete  
 265 absence of Muricid predation.

266

267 **Fig 9.** Barplots showing comparison between Kerala and Kutch drilling frequency (DF) (A);  
 268 incomplete drilling frequency (IDF) (B) and site selectivity (C).

269

270 **Table 6.** Comparison of drilling frequencies between Kerala and Kutch data.

271

| Location | DF    | IDF  | Umbonal drilling | Middle drilling | Edge drilling |
|----------|-------|------|------------------|-----------------|---------------|
| Kerala   | 0.061 | 0.2  | 0.3617           | 0.4043          | 0.234         |
| Kutch    | 0.253 | 0.41 | 0.1333           | 0.68889         | 0.1778        |

272

273

274 The two fauna show different size selectivity. Unlike microfauna of Kerala,  
 275 distribution of drilled and undrilled prey size are not significantly different in Kutch fauna  
 276 (K-S test statistic  $D=0.21$ ,  $p=0.07$ , Fig 10A). Moreover, it does not show a significant  
 277 correlation between size of prey and Naticid predator – a trend that is observed in microfauna  
 278 of Kerala (Fig 10B, Table 5). Both the regions, however, show significant negative

279 correlation between predator size with prey/predator ratio (Fig 10C, Table 5). When we  
280 compared the data with three models of increasing, decreasing and constant prey size with  
281 increasing predator size (Data File S2), both the regions matched the model corresponding to  
282 constant and increasing prey-size with increasing predator-size.

283

284 **Fig 10.** Plots showing comparison of prey size distribution between the Kerala and Kutch  
285 fauna (A), relationship between PPSRs (B) and the comparison based on the cost-benefit  
286 model (C). The open circles represent Naticid attack and the solid triangles represent Muricid  
287 attacks.

288

289 In a family specific comparison with global data of Miocene (Data File S3),  
290 microbivalves demonstrate a low DF in comparison to the mean DF in all instances except  
291 for Anomiidae; the observed DF of microbivalve is often lower than the lowest reported  
292 value of DF for corresponding family (Fig 11).

293

294 **Fig 11.** Plots showing comparison of DF for individual families between globally reported  
295 data for macrobivalve specimens (>5mm) and the present study. The boxes are defined by  
296 25th and 75th quantiles; thick line represents median value.

297

## 298 **Discussion**

299 Record of predatory drillhole is one of the unique instances where predator-prey  
300 dynamics can be studied quantitatively in deep-time. Among the studied prey taxa, bivalves  
301 are one of the major contributors [9]. Yet, documentation of predation on bivalve  
302 microfossils are largely absent except for a few brief reports [43, 44]. Consequently, the

303 nature of drilling predation in extremely small bivalves is largely unknown. Present study is  
304 the first detailed attempt to understand the predator-prey dynamics at extreme size class.

305

## 306 **Nature of prey and predator**

307 Microbivalves, primarily defined based on their small size (<10mm) [45], are  
308 enigmatic in their identity. Although some micromolluscs belong to families in which large  
309 species predominate, the majority occur in relatively few families that are composed  
310 exclusively of small species [45, 46]. On the other hand, juveniles of all families of bivalve  
311 also contribute to the microscopic size spectrum of bivalve population and they often lack  
312 adult characteristics. The studied fauna shows a number of families outside the exclusively  
313 micromolluscan families [47]. Few species found in this assemblage, are represented by  
314 larger megascopic individuals collected from the same formation [36]. The microscopic  
315 bivalves of our study, therefore, probably represent the smaller individuals of available  
316 species.

317 Majority of drilling in the present study is similar to those created by predatory  
318 gastropods. The exact identification of predatory family is more complicated for  
319 microbivalve community. The identification criteria for Muricid vs Naticid drillholes are  
320 primarily developed based on the morphological nature of drillings on thick shelled molluscs.  
321 With thin shelled microbivalves, the drillhole morphology is often uncharacteristic. However,  
322 many of them represent characteristic marks of muricid and naticid drilling. The existence of  
323 three genera of Naticid (*Natica*, *Tanea* and *Polinices*) and two genera of Muricid (*Triplex* and  
324 *Dermomurex*) from the same locality supports our identification [48]. Majority of the  
325 individuals of these predatory gastropod genera are quite small (<10mm), making them  
326 potential predators for microfauna. Experimental studies demonstrated that juveniles of both  
327 muricids and naticids create drillholes where the diameters are less than 0.1mm [49, 50],

328 often with irregular outline [51]. Although, some of the holes in our studied material match  
329 this description (Fig 2E,G), many are quite regular in form. Moreover, a few studies claimed  
330 that gastropods are not always able to drill immediately after hatching. Muricid gastropod  
331 *Nucella lapillus* does not drill their usual prey barnacle upon hatching [52]. Instead, they feed  
332 on unfertilized eggs, small polychaetes before finally switching to their usual diet of bivalves  
333 and barnacles after attaining a minimum shell height of ~8mm. Juvenile Naticids are also  
334 found to prey upon other groups such as ostracods [53] and foraminifera [54], instead of  
335 bivalves. Considering the dominantly smooth outline and high average value of OBD  
336 ( $\gg 0.1\text{mm}$ ) of the studied drillholes, smaller individuals of the reported genera are more  
337 likely to be the predators over the juveniles.

338 Muricid gastropods attack and drill primarily epifaunally. However, they may scour  
339 shallow infaunal prey [16]. This explains the Muricid drillings on infaunal bivalves in the  
340 assemblage. Naticid is much more versatile; although primarily it hunts infaunally, it can  
341 perform the entire predatory action on the sediment surface [55]. Absolute dominance of  
342 Naticid drilling in both infauna and epifauna of the studied assemblage shows such versatility  
343 of Naticids.

344

### 345 **Prey selectivity in extreme size class**

346 Leighton (2003) [56] showed a positive correlation exists between relative abundance  
347 of each species and their predation intensity for brachiopod group. However, results from  
348 other studies challenge the generality of this observation [16, 25, 41]. Our data also shows  
349 that abundance of taxa is not a good predictor of drilling frequency. We found Cardidae to be  
350 the most abundant taxa and the highest DF is observed in Anomidae indicating prey  
351 selectivity.



352 Incomplete drillholes are the signature of failed attacks caused by effective defensive  
353 morphology of the prey (such as large size, ornamentation), presence of secondary predators,  
354 competition etc [57-59]. Our data shows strong association between IDF and the  
355 morphological defense of the prey taxa. Incomplete drillholes occur only in two families,  
356 Lucinidae and Corbulidae, characterized by unique morphological feature. Lucinidae species  
357 have heavy ornamentation on the shell surface which is known to impart resistance against  
358 drilling [60]. Concentric ribs of Lucinids that increase effective thickness, can provide  
359 effective resistance against drilling only when selected as the drilling location. The fact that  
360 majority of the incomplete drillholes located on the ribs and not in between, supports this  
361 argument (Fig 2G). Drilling predation is claimed to be inhibited in Corbulidae due to the  
362 presence of conchiolin layers within corbulid valves [41, 61-63] along with other  
363 antipredatory morphology such as increased valve thickness, increased inflation [64]. The  
364 lower success rate in Corbulidae points to the morphological defence. We also found average  
365 prey size with incomplete drillholes are larger than those with complete ones for both of the  
366 cases; this supports the claim of bigger size as responsible factor for producing incomplete  
367 drillholes in these two families.

368 Ecological selectivity plays a major role in drilling predation. In general, epifauna are  
369 more susceptible to predation by epibenthic than infauna [1, 65]. Our results, however, does  
370 not support this notion of increased protection for infauna at such small size class. This may  
371 be due to the fact that depth of infauna at such size class is not enough to offer effective  
372 protection against predators including epifaunal predators. Abundance of Muricid drilling in  
373 the infaunal prey in our sample supports this. Mobile behavior of bivalves has been claimed  
374 to be an efficient strategy to evade predators [13, 66, 67]. Mobility seems to be an effective  
375 defense even at such small size class, especially fending Muricid gastropods that succeeded  
376 more attacking immobile prey. Mobile prey even at small size seems to either achieve

377 complete evasion (low DF) or escape after being attacked (high IDF); this pattern indicates  
378 that mobility offers predation refuge for extremely small sized bivalves.

379         The position of the drillhole on the prey shell is indicative of the degree of behavioral  
380 stereotypy of the predator. Non-random siting of drillholes is primarily related to  
381 manipulation technique of the predator [68] and dependent on the morphology of the prey  
382 [69-71]. Such site preference is widely reported, especially for Naticids [22, 72-75]. Such  
383 high level of stereotypic behavior of Naticids may be due to the fact that they completely  
384 cover their prey inside the mantle and has lesser flexibility. Muricids, on the other hand,  
385 crawl across bivalve prey before initiation of drilling, and thus may show more variation in  
386 drillhole position [76]. We did not, however, find any difference in degree of stereotypy  
387 between Muricid and Naticid. Majority of our specimens show central position of drillhole  
388 irrespective of the predator identity. The location of the drillholes also provide important  
389 information on predation dynamics. Umbonal drilling, although common among bivalves in  
390 general, is not profitable for the predator because of the high thickness of area. This thickness  
391 increases substantially with increasing size of the prey and may pose deterrence to drilling.  
392 The common occurrence of umbonal drilling is probably due to the fact that it offers the  
393 predator some advantage in handling the prey more effectively. At extremely small size,  
394 umbonal thickness is not substantially different from the rest of the shell and hence should be  
395 preferred. Our specimens, however, do not show a significant dominance of umbonal drilling.  
396 Edge drilling, on the other hand is considered a faster technique albeit risky; a prey can  
397 damage the feeding organ (proboscis) by clamping down [77]. Edge-drilling was used when  
398 competition was intense [78]. We also found a significant number of edge drilling in our data  
399 indicating to probably a competitive scenario [12]. This is not unlikely considering the large  
400 number of young individuals after spawning season of predator that exponentially decrease  
401 with time before reaching a plate near adulthood.

402

## 403 **Size selectivity in extreme size class**

404           Size is a crucial factor in controlling prey selection by drilling predators. Drillhole  
405 size is indicative of the size of the drillers for both Muricid and Naticid gastropods [22, 79].  
406 Well accepted equations to derive predator size from OBD are primarily developed from  
407 feeding experiments using extant gastropods of normal size; the applicability of these  
408 equations to smaller size class has not been tested explicitly. The inferred gastropod size  
409 using the drillholes of our study matches the general size spectrum of gastropods reported  
410 from this locality [48] confirming the generality of these relationships even at such smaller  
411 size class.

412           The positive correlation between Naticid predator and prey size in microbivalve  
413 assemblage indicates a size dependent prey choice. This relationship has been explained as an  
414 energy maximizing strategy that balance the energy gain associated with the large food items  
415 and the energy spend associated with capturing and boring that large prey item [22]. For  
416 Muricid, the size relationship between prey and predator does not show any significant  
417 correlation. Unlike Naticids, energetically viable attacks by Muricids are often associated  
418 with insignificant correlation between predator and prey size [26, 57].

419           Previous studies reported the existence of a handling limit for a specific predator,  
420 beyond which the attacks are likely to fail and prey larger than this handling limit is immuned  
421 from successful attacks [22, 26]. Size emerges as an important factor when we evaluate the  
422 taxa without any drillholes. Both Arcidae and Veneridae are significantly different in size  
423 than the families with drillhole. The larger size of Arcidae supports the idea of a “size refuge”  
424 [1, 22]. The smaller size of Veneridae is also probably protecting it by offering limited  
425 nutritional value and hence providing a “inverse size refugia”. Although Tellinidae did not

426 show any size difference, extremely low abundance (low encounter rate) of this taxon may be  
427 responsible for lack of drilling.

428

## 429 **Nature of prey-predator size dynamics**

430 Prey preference by the predator is best evaluated using cost-benefit model developed  
431 on the tenets of optimal foraging theory. Such models have been used to correctly predict the  
432 prey choice for both Naticid [22, 41, 80] and Muricid [26]. For these models, cost-benefit  
433 ratio is estimated by the ratio of shell thickness and internal volume of the prey. Due to the  
434 small size of our specimen, it was not realistic to measure the thickness of the shell. In  
435 absence of this information, ratio of prey and predator has also been used to evaluate the  
436 relative change of predatory behavior [81]. Predators always prefer the prey item with lowest  
437 cost-benefit ratio in the size range that can be handled [16]. Cost: benefit ratio of a particular  
438 prey taxon generally decreases with ontogeny due to relatively higher energetic yield of the  
439 biomass [22]. Consequently, for a specific predator size prey with larger size ought to be  
440 beneficial if thickness does not change significantly. Because of the extremely small size and  
441 early ontogenetic stage, we do not expect significant variation in thickness in the  
442 microbivalve population. Our study, however, shows a very high prey: predator size ratio for  
443 small predators and the ratio decreases with increasing size of the predator. To give rise to  
444 this apparent counterintuitive decreasing prey-predator size ratio, the predator needs to  
445 exercise one of the following options with increasing size: a) maintain a constant prey size  
446 choice, b) choose smaller prey or c) choose larger prey, but not proportionally large. Our  
447 models show that, the declining ratio of prey:predator is achieved by maintaining a constancy  
448 of prey size or choosing inadequately large prey. Interestingly, Muricids tend to show a  
449 preference towards lower size in comparison to Naticids. In comparison to megabenthic  
450 community of Kutch, the macrobenthos is characterized by a higher prey-predator ratio

451 although the change in prey choice by increasing size of the predator shows similar trend.  
452 The relatively lower value of prey-predator ratio for larger predators of Kutch is still probably  
453 energetically viable because energetic yield of the prey increases exponentially with  
454 increasing prey size ([22], Fig. 1)

455

## 456 **Possible effect of taphonomy and depositional environment**

457 Comparison might be affected by the fact that these two regions represent two  
458 different depositional environments. Kerala has been interpreted to represent a seagrass  
459 environment [39] that is often characterized by low of predation pressure [82, 83]. The  
460 emergent seagrass blades cause decrease in the mobility of predators and the visual detection  
461 of prey [82, 84] and the roots and rhizomes of the seagrass act as a barrier to digging  
462 predators from attacking the infaunal preys [83, 85]. Thus, the predation refuge which the  
463 seagrass offers to the bivalves causes the decrease in overall predation pressure. However, the  
464 infauna in the microbivalves of the studied locality does infact show slightly higher predation  
465 intensity. Moreover, the low family-specific DF of microbivalves in comparison to global  
466 record of Miocene makes it unlikely that the depositional environment alone is creating such  
467 low predation intensity.

468 Taphonomic attributes are different for macro and micro invertebrates. Generally  
469 smaller individuals shelly invertebrates are poorly preserved [86] and are often affected more  
470 by other taphonomic attributes such as hydrodynamic sorting, that may even alter drilling  
471 signature [12, 87]. Considering the relatively pristine state of preservation of macrobenthos of  
472 our study, however, it is unlikely to assume taphonomy to be the primary contributor of  
473 generating the pattern.

474

## 475 **Evolutionary implication**

476 In a study on modern brachiopods, Harper and Peck [33] found a significant  
477 proportion of micromorphic brachiopods in the tropics. All three extant clades of brachiopods  
478 from tropical ocean are micromorphic. Brachiopods found till 17° in the southern hemisphere  
479 are characterized by the complete absence of large (>10mm) species [88]. The micromorphic  
480 individuals were often better protected against durophagous predation. In a study on the  
481 predation intensity of temperate rhynchonelliforms, Harper et al [32] found the existence of  
482 both classical size refugia for larger individuals as well as “inverse size refugia”. Along with  
483 low frequency of repair scars in large individuals, the micromorphic ones (<5 mm) showed  
484 almost complete absence of predation. The preferred target group appeared to be the medium  
485 size class (20- 40 mm) with the frequency of repair scars normally distributed around that  
486 class validating the prediction of optimal foraging theory [89]. Apart from the low energetic  
487 yield of the small brachiopods, the low intensity of durophagous predation in small  
488 brachiopods could be because of their inaccessibility due to cryptic life habit [90]. Based on  
489 these, Harper and Peck [34] hypothesized that micromorphy of brachiopods is a likely  
490 outcome of intense durophagous predation in the tropics and proposed micromorphy to be an  
491 adaptive response to increasing durophagy at lower latitudes. Our study finds evidence of  
492 effective defense rendered by micromorphy against drilling predation. The observed DF is  
493 the lowest in comparison to majority the reported DFs from Miocene [25] pointing to the  
494 rarity of such low predation intensity. Because of the effective defense in large and small  
495 groups, we can expect an evolutionary trend towards increasing variance in the size of the  
496 prey. Phanerozoic nature of predator-prey size ratio shows an increase without significant  
497 change in prey size [91]. The variance in prey size is not showing recognizable directional  
498 trend either (Fig.2A, [90]). However, it is known that the preservation potential of small  
499 shells is significantly lower than the larger shells [86]. This makes it hard to comment on the  
500 evolutionary trend of predation in extremely small prey. Moreover, we do not know if the

501 intensity of predation changed inhomogenously across size classes. It would be, therefore,  
502 important to focus on relative proportion of drilling frequency across size classes through  
503 time to appreciate the advantage of micromorphy against predation in evolutionary  
504 timescale.

505

## 506 **Conclusions**

507 Our study documents the drilling predation dynamics in the extreme size class of  
508 micromolluscs from Early Miocene deposits of India. Our analyses demonstrate that the  
509 drilling predation in extreme size class is highly selective in terms of prey taxa, size, mobility  
510 and site selection. Drilling occur primarily on medium size class (0.83- 2.32 mm) and prey  
511 outside this size range are less likely to be attacked. This indicates the existence of an  
512 “inverse size refugia” for extremely small prey along with the classical size refugia existing  
513 for large prey. Mobility is found to be deterrent to drilling predation and it also increases  
514 failure. In comparison to the predation in macrobenthos of the same biogeographic province  
515 of coeval formation, microbenthos shows a lower level of predation intensity and rate of  
516 failure. The interactions in microbenthos seems to be more strongly size-dependent compared  
517 to those among the macrobenthos that are often characterized by a lack of prey-predator size  
518 relationship. In comparison to the drilling predation in macrobenthos of global occurrences  
519 during Miocene, microbenthos shows a lower level of predation intensity in a family specific  
520 analyses. Prey-predator interaction in extreme size class highlights the importance of size in  
521 determining the nature of predation dynamics. Considering the plasticity of body size in  
522 response to environmental triggers, changing predation dynamics would be expected during  
523 times of environmental change and would have significant effect in shaping the natural  
524 selection of a group in deep time.

525

## 526 **Acknowledgements**

527 This work was supported by Academic Research Grant, IISER Kolkata (ARF 2018-19),  
528 IISER Kolkata graduate research fellowship and DST Inspire fellowship.

529

## 530 **Supplementary materials**

### 531 **Data File S1. Dataset used for present study**

532 Family : Family names of bivalves; Prey size: Length of the prey; Drill hole morphology:  
533 morphology of the drill holes/ Predator identity; Drill hole diameter: Outer borehole  
534 diameter of the drill hole; Position: Position of the drill hole; Completion: Completion of  
535 drill hole; Drilling: Type of prey (drilled or undrilled); Predator size: Length of the predator,  
536 Kerala; Location: Name of the location from where specimens were collected; Size class:  
537 small, medium or large.

538

### 539 **Data File S2. Dataset used for present study**

540 Prey1\_increasing (mm): Prey size in increasing order keeping minimum and maximum  
541 values same as original data; Prey1\_decreasing (mm): Prey size in decreasing order keeping  
542 minimum and maximum values same as original data; Prey1\_constant (mm): Mean prey size  
543 of original data; Predator1\_increasing (mm): Predator size in increasing order keeping  
544 minimum and maximum values same as original data; Location: Name of the location from  
545 where specimens were collected.

546

### 547 **Data File S2. Dataset used for present study**



548 Authors: Name of the authors of the published literature from where DF is collected; Year:  
549 Year of publication; Title: Title of the literature; Prey: Type of Prey item; Prey family: Name  
550 of the famies; DF: Drilling frequency; Age: Age of the formation from where species are  
551 collected.

552

## 553 **References**

- 554 1. Vermeij GJ (1987) *Evolution and Escalation, an Ecological History of Life*. Princeton  
555 University Press 527.
- 556 2. Thompson JN (1988) Coevolution and Alternative Hypotheses on Insect/Plant  
557 Interactions. *Ecology* 69: 893–895.
- 558 3. Stanley SM (2008) Predation defeats competition on the seafloor. *Paleobiology* 34: 1–  
559 21.
- 560 4. Warren APH, Lawton JH (2016) International Association for Ecology Invertebrate  
561 Predator-Prey Body Size Relationships : An Explanation for Upper Triangular Food Webs  
562 and Patterns in Food Web Structure ? *Oecologia* 74: 231–235.
- 563 5. Brose U (2010) Body-mass constraints on foraging behavior determine population  
564 and food-web dynamics. *Functional Ecology* 24: 28–34.
- 565 6. Blanchard DC, Griebel G, Pobbe R, Blanchard RJ (2011) Risk assessment as an  
566 evolved threat detection and analysis process. *Neuroscience and Biobehavioral Reviews* 35:  
567 991–998.
- 568 7. Yvon-Durocher G, Reiss J, Blanchard J, Ebenman B, Perkins DM, Reuman DC,  
569 Petchey OL (2011) Across ecosystem comparisons of size structure: methods, approaches  
570 and prospects. *Oikos*, 120: 550–563.

- 571 8. Brose U, Williams RJ, Martinez ND (2006). Allometric scaling enhances stability in  
572 complex food webs. *Ecology Letters* 9: 1228–1236.
- 573 9. Klompmaker AA, Kelley, PH, Chattopadhyay D, Clements JC, Huntley JW,  
574 Kowalewski M (2019) Predation in the marine fossil record: Studies, data, recognition,  
575 environmental factors, and behavior. *Earth-Science Reviews*.
- 576 10. Kingsley-Smith PR, Richardson CA, Seed R (2003) Stereotypic and size-selective  
577 predation in *Polinices pulchellus* (Gastropoda: Naticidae) Risso 1826. *Journal of*  
578 *Experimental Marine Biology and Ecology*, 295: 173–190.
- 579 11. Sawyer JA, Zuschin M (2010) Intensities of drilling predation of molluscan  
580 assemblages along a transect through the northern Gulf of Trieste (Adriatic  
581 Sea). *Palaeogeography, Palaeoclimatology, Palaeoecology*, 285: 152–173.
- 582 12. Chattopadhyay D, Zuschin, M, Tomasovych A (2014) Effects of a high-risk  
583 environment on edge-drilling behavior: Inference from Recent bivalves from the Red Sea.  
584 *Paleobiology* 40: 34–49.
- 585 13. Chattopadhyay D, Zuschin M, Tomašových A (2015) How effective are ecological  
586 traits against drilling predation? Insights from recent bivalve assemblages of the northern  
587 Red Sea. *Palaeogeography, Palaeoclimatology, Palaeoecology* 440: 659–670.
- 588 14. Huntley JW, Kowalewski M, (2007) Strong coupling of predation intensity and  
589 diversity in the Phanerozoic fossil record. *Proceedings of the National Academy of Sciences*  
590 104: 15006–15010.
- 591 15. Kowalewski M, Dulai A, Fürsich FT, 1998. A fossil record full of holes: The  
592 Phanerozoic history of drilling predation. *Geology* 26: 1091–1094.
- 593 16. Kelley PH, Hansen TA (2003) The Fossil Record of Drilling Predation on Bivalves  
594 and Gastropods. *Predator- Prey Interactions in the Fossil Record* 20: 113–139.
- 595 17. Elton CS (2001). *Animal ecology*. University of Chicago Press.

- 596 18. Nakazawa T, Ohba SY, Ushio M (2013) Predator–prey body size relationships when  
597 predators can consume prey larger than themselves. *Biology letters* 9: 20121193.
- 598 19. Cohen JE, Jonsson T, Carpenter SR, (2003) Ecological community description using  
599 the food web, species abundance, and body size. *Proceedings of the National Academy of*  
600 *Sciences* 100: 1781–1786.
- 601 20. Woodward GB, Ebenman M, Emmerson JM, Montoya JM, Olesen AV, Warren PH  
602 (2005) Body size in ecological networks. *Trends in Ecology & Evolution* 20: 402–409.
- 603 21. Petchey OL, Beckerman AP, Riede JO, Warren PH, Designed PHW, Performed PHW  
604 (2008) Size, foraging, and food web structure. *Proceedings of the Indian Academy of*  
605 *Sciences* 105: 4191–4196.
- 606 22. Kitchell JA, Boggs CH, Kitchell JF, Rice JA, (1981) Prey Selection by naticid  
607 gastropods: experimental tests and application to the fossil record. *Paleobiology* 7: 533–  
608 552.
- 609 23. Palmer AR (1988) Feeding biology of *Ocenebra lurida* (Prosobranchia: Muricacea):  
610 diet, predator-prey size relations, and attack behavior. *Veliger*, 31: 192–203.
- 611 24. Kowalewski M (2004) Drill Holes Produced By the Predatory Gastropod *Nucella*  
612 *Lamellosa* (Muricidae): Palaeobiological and Ecological Implications. *Journal Molluscan*  
613 *Studies* 70: 359–370.
- 614 25. Chattopadhyay D, Dutta S (2013) Prey selection by drilling predators: A case study  
615 from Miocene of Kutch, India. *Palaeogeography, Palaeoclimatology, Palaeoecology* 374:  
616 187–196.
- 617 26. Chattopadhyay D, Baumiller TK (2009) An Experimental Assessment of Feeding  
618 Rates of the Muricid Gastropod *Nucella lamellosa* and Its Effect on a Cost-Benefit  
619 Analysis. *Journal of Shellfish Research* 28: 883–889.

- 620 27. DeAngelis DL, Kitchell JA, Post WM (1985). The influence of naticid predation on  
621 evolutionary strategies of bivalve prey: conclusions from a model. *The American Naturalist*  
622 126: 817–842.
- 623 28. Hart PJB (1986) Foraging in Teleost Fishes. In *The Behavior of Teleost Fishes* 211–  
624 235.
- 625 29. Paine RT (1965) Natural history, limiting factors and energetics of the opisthobranch  
626 *Navanax inermis*. *Ecology* 46: 603–619.
- 627 30. Paine RT (1976) Size-limited predation: an observational and experimental approach  
628 with the *Mytilus*-*Pisaster* interaction. *Ecology* 57: 858–873.
- 629 31. Dayton PK (1971) Competition, disturbance, and community organization: the  
630 provision and subsequent utilization of space in a rocky intertidal community. *Ecological*  
631 *Monographs* 41: 351–389.
- 632 32. Harper EM, Peck LS, Hendry KR (2009) Patterns of shell repair in articulate  
633 brachiopods indicate size constitutes a refuge from predation. *Marine Biology* 156: 1993–  
634 2000.
- 635 33. Richards EJ, Leighton LR (2012). Size refugia from predation through time: A case-  
636 study of two Middle Devonian brachiopod genera. *Palaeogeography, Palaeoclimatology,*  
637 *Palaeoecology*, 363: 163–171.
- 638 34. Harper EM, Peck LS (2016) Latitudinal and depth gradients in marine predation  
639 pressure. *Global Ecology and Biogeography* 25: 670–678.
- 640 35. Harzhauser M, Reuter M, Piller WE, Berning B, Kroh A, Mandic O (2009) Oligocene  
641 and Early Miocene gastropods from Kutch (NW India) document an early biogeographic  
642 switch from Western Tethys to Indo-Pacific. *Paläontologische Zeitschrift* 83: 333–372.
- 643 36. Dey AK (1961) The Miocene mollusca from Quilon, Kerala (India). *Paleontologia*  
644 *Indica* XXXVI.

- 645 37. Menon KK (1967a) The lithology and sequence of the Quilon beds. Proceedings of  
646 the Indian Academy of Sciences 65: 20–25.
- 647 38. Menon KK (1967b) Origin of diagenetic pyrite in the Quilon Limestone, Kerala,  
648 India. Nature 213: 1219–1220.
- 649 39. Reuter M, Piller WE, Harzhauser M, Kroh A, Rögl F, Ćorić S (2011) The Quilon  
650 Limestone, Kerala Basin, India: An archive for Miocene Indo-Pacific seagrass beds. Lethaia  
651 44: 76–86.
- 652 40. Kowalewski M (2002) The fossil record of predation: an overview of analytical  
653 methods. The Paleontological Society Papers 8: 3–42.
- 654 41. Kelley PH (1988) Predation by Miocene gastropods of the Chesapeake Group:  
655 stereotyped and predictable. Palaios 3: 436–448.
- 656 42. R Core Development Team (2012) 53. R: a language and environment for statistical  
657 computing, (R Foundation for Statistical Computing, Vienna [www.R-project.org](http://www.R-project.org)).
- 658 43. Cruz J (2013) Decrease then increase in predation on microbivalves by juvenile  
659 Naticid gastropods across the Pliocene-Pleistocene boundary, Southeastern North Carolina  
660 coastal plain. GSA Annual Meeting in Denver 45: 315.
- 661 44. Horner HG, Reed MP, Yeung W, Christoff KN, Dennett AM, Hobart CE, Bellusci  
662 MD, Engelbert AJ, Wallace J (2014) No significant changes in microbivalve and ostracode  
663 diversity or on predation by gastropods across Pliocene-Pleistocene boundary in  
664 Southeastern North Carolina. GSA Annual Meeting in Vancouver 133.
- 665 45. Beu AG, Maxwell PA (1990) Cenozoic Mollusca of New Zealand: New Zealand  
666 Geological Survey Palaeontological Bulletin 58: 75-454.
- 667 46. Morley MS, Hayward BW (2016) Biogeography and biodiversity of intertidal  
668 micromollusca of northern New Zealand. Records of the Auckland Museum 51: 55–77.

- 669 47. Kella VGS, Chattopadhyay D, Chattopadhyay D (2018) Drilling predation in extreme  
670 size class: Insight from Early Miocene micro molluscan assemblage of Kerala, India.  
671 Geological Society of America Abstracts 50: 6.
- 672 48. Harzhauser M (2014) A seagrass-associated Early Miocene Indo-Pacific gastropod  
673 fauna from South West India (Kerala). *Palaeontographica Abteilung A* 1: 73–178.
- 674 49. Carriker MR, Yochelson EL (1968) Recent gastropod boreholes and Ordovician  
675 cylindrical borings. In United States Geological Survey Professional Paper 593.
- 676 50. Reyment RA, Reyment ER, Honigstein A (1987) Predation by boring gastropods on  
677 Late Cretaceous and Early Palaeocene ostracods. *Cretaceous Research* 8: 189–209.
- 678 51. Carriker MR (1957) Preliminary study of behavior of newly hatched Oyster drills,  
679 *Urosalpinx cinerea* (say). *Journal of the Elisha Mitchell Scientific Society* 73: 328–351.
- 680 52. Fischer-Piette E (1935) Histoire d'une mouliere. *Bulletin Biologique de La France et*  
681 *de La Belgique* 69: 153–177.
- 682 53. Reyment RA, Elewa AMT (2003) Predation by Drills on Ostracoda. *Predator—Prey*  
683 *Interactions in the Fossil Record* 20: 93–111.
- 684 54. Culver SJ, Lipps JH (2003) Predation on and by Foraminifera. In *Predator—Prey*  
685 *Interactions in the Fossil Record* 20: 7–32.
- 686 55. Savazzi E, Reyment RA (1989) Subaerial hunting behaviour in *Natica gualteriana*  
687 (naticid gastropod). *Palaeogeogr. Palaeoclimatol. Palaeoecol.* 74: 355–364.
- 688 56. Leighton LR (2003) Morphological response of prey to drilling predation in the  
689 Middle Devonian. *Palaeogeography, Palaeoclimatology, Palaeoecology* 201: 221–234.
- 690 57. Chattopadhyay D, Baumiller TK (2007) Drilling under threat: An experimental  
691 assessment of the drilling behavior of *Nucella lamellosa* in the presence of a predator.  
692 *Journal of Experimental Marine Biology and Ecology* 352: 257–266.

- 693 58. Chattopadhyay D, Baumiller TK (2010) Effect of durophagy on drilling predation: A  
694 case study of Cenozoic molluscs from North America. *Historical Biology* 22: 367–379.
- 695 59. Hutchings J, Herbert GS (2013) No honor among snails: conspecific competition  
696 leads to incomplete drill holes by a naticid gastropod. *Palaeogeography, Palaeoclimatology,*  
697 *Palaeoecology*, 379: 32–38.
- 698 60. Klompmaker AA, Kelley PH (2015) Shell ornamentation as a likely exaptation:  
699 Evidence from predatory drilling on Cenozoic bivalves. *Paleobiology* 41: 187–201.
- 700 61. DeCauwer G (1985) Gastropod predation on corbulid bivalves. *Paleoecology or*  
701 *taphonomy?*. *Ann. Soc. R. Zool. Belg./ann. k. Belg. ver. Dierkd* 115: 183–196.
- 702 62. Kardon G (1998) Evidence from the fossil record of an antipredatory exaptation:  
703 conchiolin layers in Corbulid bivalves. *Evolution* 52: 68–79.
- 704 63. Anderson LC (1992) Naticid gastropod predation on corbulid bivalves: effects of  
705 physical factors, morphological features, and statistical artifacts. *Palaios* 7: 602–620.
- 706 64. Boulding EG (1984) Crab-resistant features of shells of burrowing bivalves:  
707 decreasing vulnerability by increasing handling time. *Journal of Experimental Marine*  
708 *Biology and Ecology* 76: 201–223.
- 709 65. Orth RJ, Heck KL, Van MJ (1984) Faunal Communities in Seagrass Beds: A Review  
710 of the Influence of Plant Structure and Prey Characteristics on Predator: Prey Relationships.  
711 *Estuaries* 7: 339–350.
- 712 66. Thayer CW (1985) Brachiopods versus mussels: Competition, predation, and  
713 playability. *Science* 228: 1527–1528.
- 714 67. Powers SP, Kittinger JN (2002) Hydrodynamic mediation of predator-prey  
715 interactions: differential patterns of prey susceptibility and predator success explained by  
716 variation in water flow. *Journal of Experimental Marine Biology and Ecology* 273: 171–  
717 187.

- 718 68. Ziegelmeier E (1954) Beobachtungen über den Nahrungserwerb bei der Naticide  
719 *Lunatia nitida* Donovan (Gastropoda Prosobranchia). Helgoländer Wissenschaftliche  
720 Meeresuntersuchungen 5: 1–33.
- 721 69. Ansell AD (1960) Observations on predation of *venus striatula* (da costa) by *Natica*  
722 *alderi* (Forbes). Journal of Molluscan Studies 34: 157–164.
- 723 70. Kitchell JA (1986) The evolution of predator-prey behavior: naticid gastropods and  
724 their molluscan prey. New York, Oxford Press 88–110.
- 725 71. Roopnarine PD, Willard S (2001) Bivalve prey morphology as a guide to drilling  
726 stereotypy of Naticid and Muricid gastropods: Venerids, Naticids and Muricids in tropical  
727 America. Paleobios 21: 109–110.
- 728 72. Taylor JD (1970) Feeding habits of predatory gastropods in a Tertiary (Eocene)  
729 molluscan assemblage from the Paris Basin. Palaeontology 13: 254–260.
- 730 73. Berg C, Porter ME (1974) Comparison of predatory behavior among Naticid  
731 gastropods *Lunatia-heros*, *Lunatia-triseriata* and *Polinices*. Biological Bulletin 147: 469–  
732 470.
- 733 74. Berg CJ, Nishenko S (1975) Stereotypy of predatory boring behavior of Pleistocene  
734 Naticid gastropods. Paleobiology 1: 258–260.
- 735 75. Rosewater VJ (1980) Predator boreholes in *Periploma-margaritaceum*, with a brief  
736 survey of other Periplomatidae (bivalviaanomalodesmata). Veliger 22: 248.
- 737 76. Chiba T, Sato S (2012) Size-selective predation and drillhole-site selectivity in  
738 *Euspira fortunei* (Gastropoda: Naticidae): Implications for ecological and palaeoecological  
739 studies. Journal of Molluscan Studies 78: 205–212.
- 740 77. Dietl GP, Herbert GS (2005) Influence of alternative shell-drilling behaviors on attack  
741 duration of the predatory snail, *Chicoreus dilectus*. Journal of Zoology 265: 201–206.



- 742 78. Dietl GP, Herbert GS, Vermeij GJ (2004) Reduced competition and altered feeding  
743 behavior among marine snails after a mass extinction. *Science* 306: 2229–2231.
- 744 79. Carriker MR, Gruber GL (1999) Uniqueness of the gastropod accessory boring organ  
745 (ABO): Comparative biology, an update. *Journal of Shellfish Research* 18: 578–595.
- 746 80. Kelley PH (1991) Apparent cannibalism by Chesapeake Group naticid gastropods: a  
747 predictable result of selective predation. *Journal of Paleontology* 65: 75–79.
- 748 81. Klompmaker AA, Nyborg T, Brezina J, Ando Y (2018) Crustaceans in cold seep  
749 ecosystems: fossil record, geographic distribution, taxonomic composition, and biology.  
750 *Geological Society of America Abstracts with Programs*.
- 751 82. Irlandi E (1997) Seagrass Patch Size and Survivorship of an Infaunal Bivalve. *Nordic*  
752 *Society Oikos* 78: 511–518.
- 753 83. Wall CC, Peterson BJ, Gobler CJ (2008) Facilitation of seagrass *Zostera marina*  
754 productivity by suspension-feeding bivalves. *Marine Ecology Progress Series* 357: 165–  
755 174.
- 756 84. Heck JK, Thoman TA (1981) Experiments on predator-prey interactions in vegetated  
757 aquatic habitats. *Journal of Experimental Marine Biology* 53: 125–134.
- 758 85. Peterson CH (1982) Clam predation by whelks (*Busycon* spp.): Experimental tests of  
759 the importance of prey size, prey density, and seagrass cover. *Marine Biology* 66: 159–170.
- 760 86. Cooper RA, Maxwell PA, Crampton JS, Beu AG, Jones CM, Marshall BA (2006)  
761 Completeness of the fossil record: Estimating losses due to small body size. *Geology* 34:  
762 241–244.
- 763 87. Chattopadhyay D, Rathie A, Miller D, Baumiller TK (2013) Hydrodynamic effects of  
764 drill holes on post-mortem transportation of bivalve shells and its taphonomic implications.  
765 *Palaios* 28: 875–884.

- 766 88. Peck LS, Harper EM (2010) Variation in size of living articulated brachiopods with  
767 latitude and depth. *Marine Biology* 157: 2205–2213.
- 768 89. Stephens DW, Krebs JR (1986) *Foraging theory*. Princeton University Press,  
769 Princeton, NJ.
- 770 90. Zuschin M, Mayrhofer S (2009) Brachiopods from cryptic coral reef habitats in the  
771 northern Red Sea. *Facies* 55: 335–344.
- 772 91. Klompmaker AA, Kowalewski M, Huntley JW, Finnegan S (2017) Increase in  
773 predator-prey size ratios throughout the Phanerozoic history of marine ecosystems. *Science*  
774 356: 1178–1180.  
775

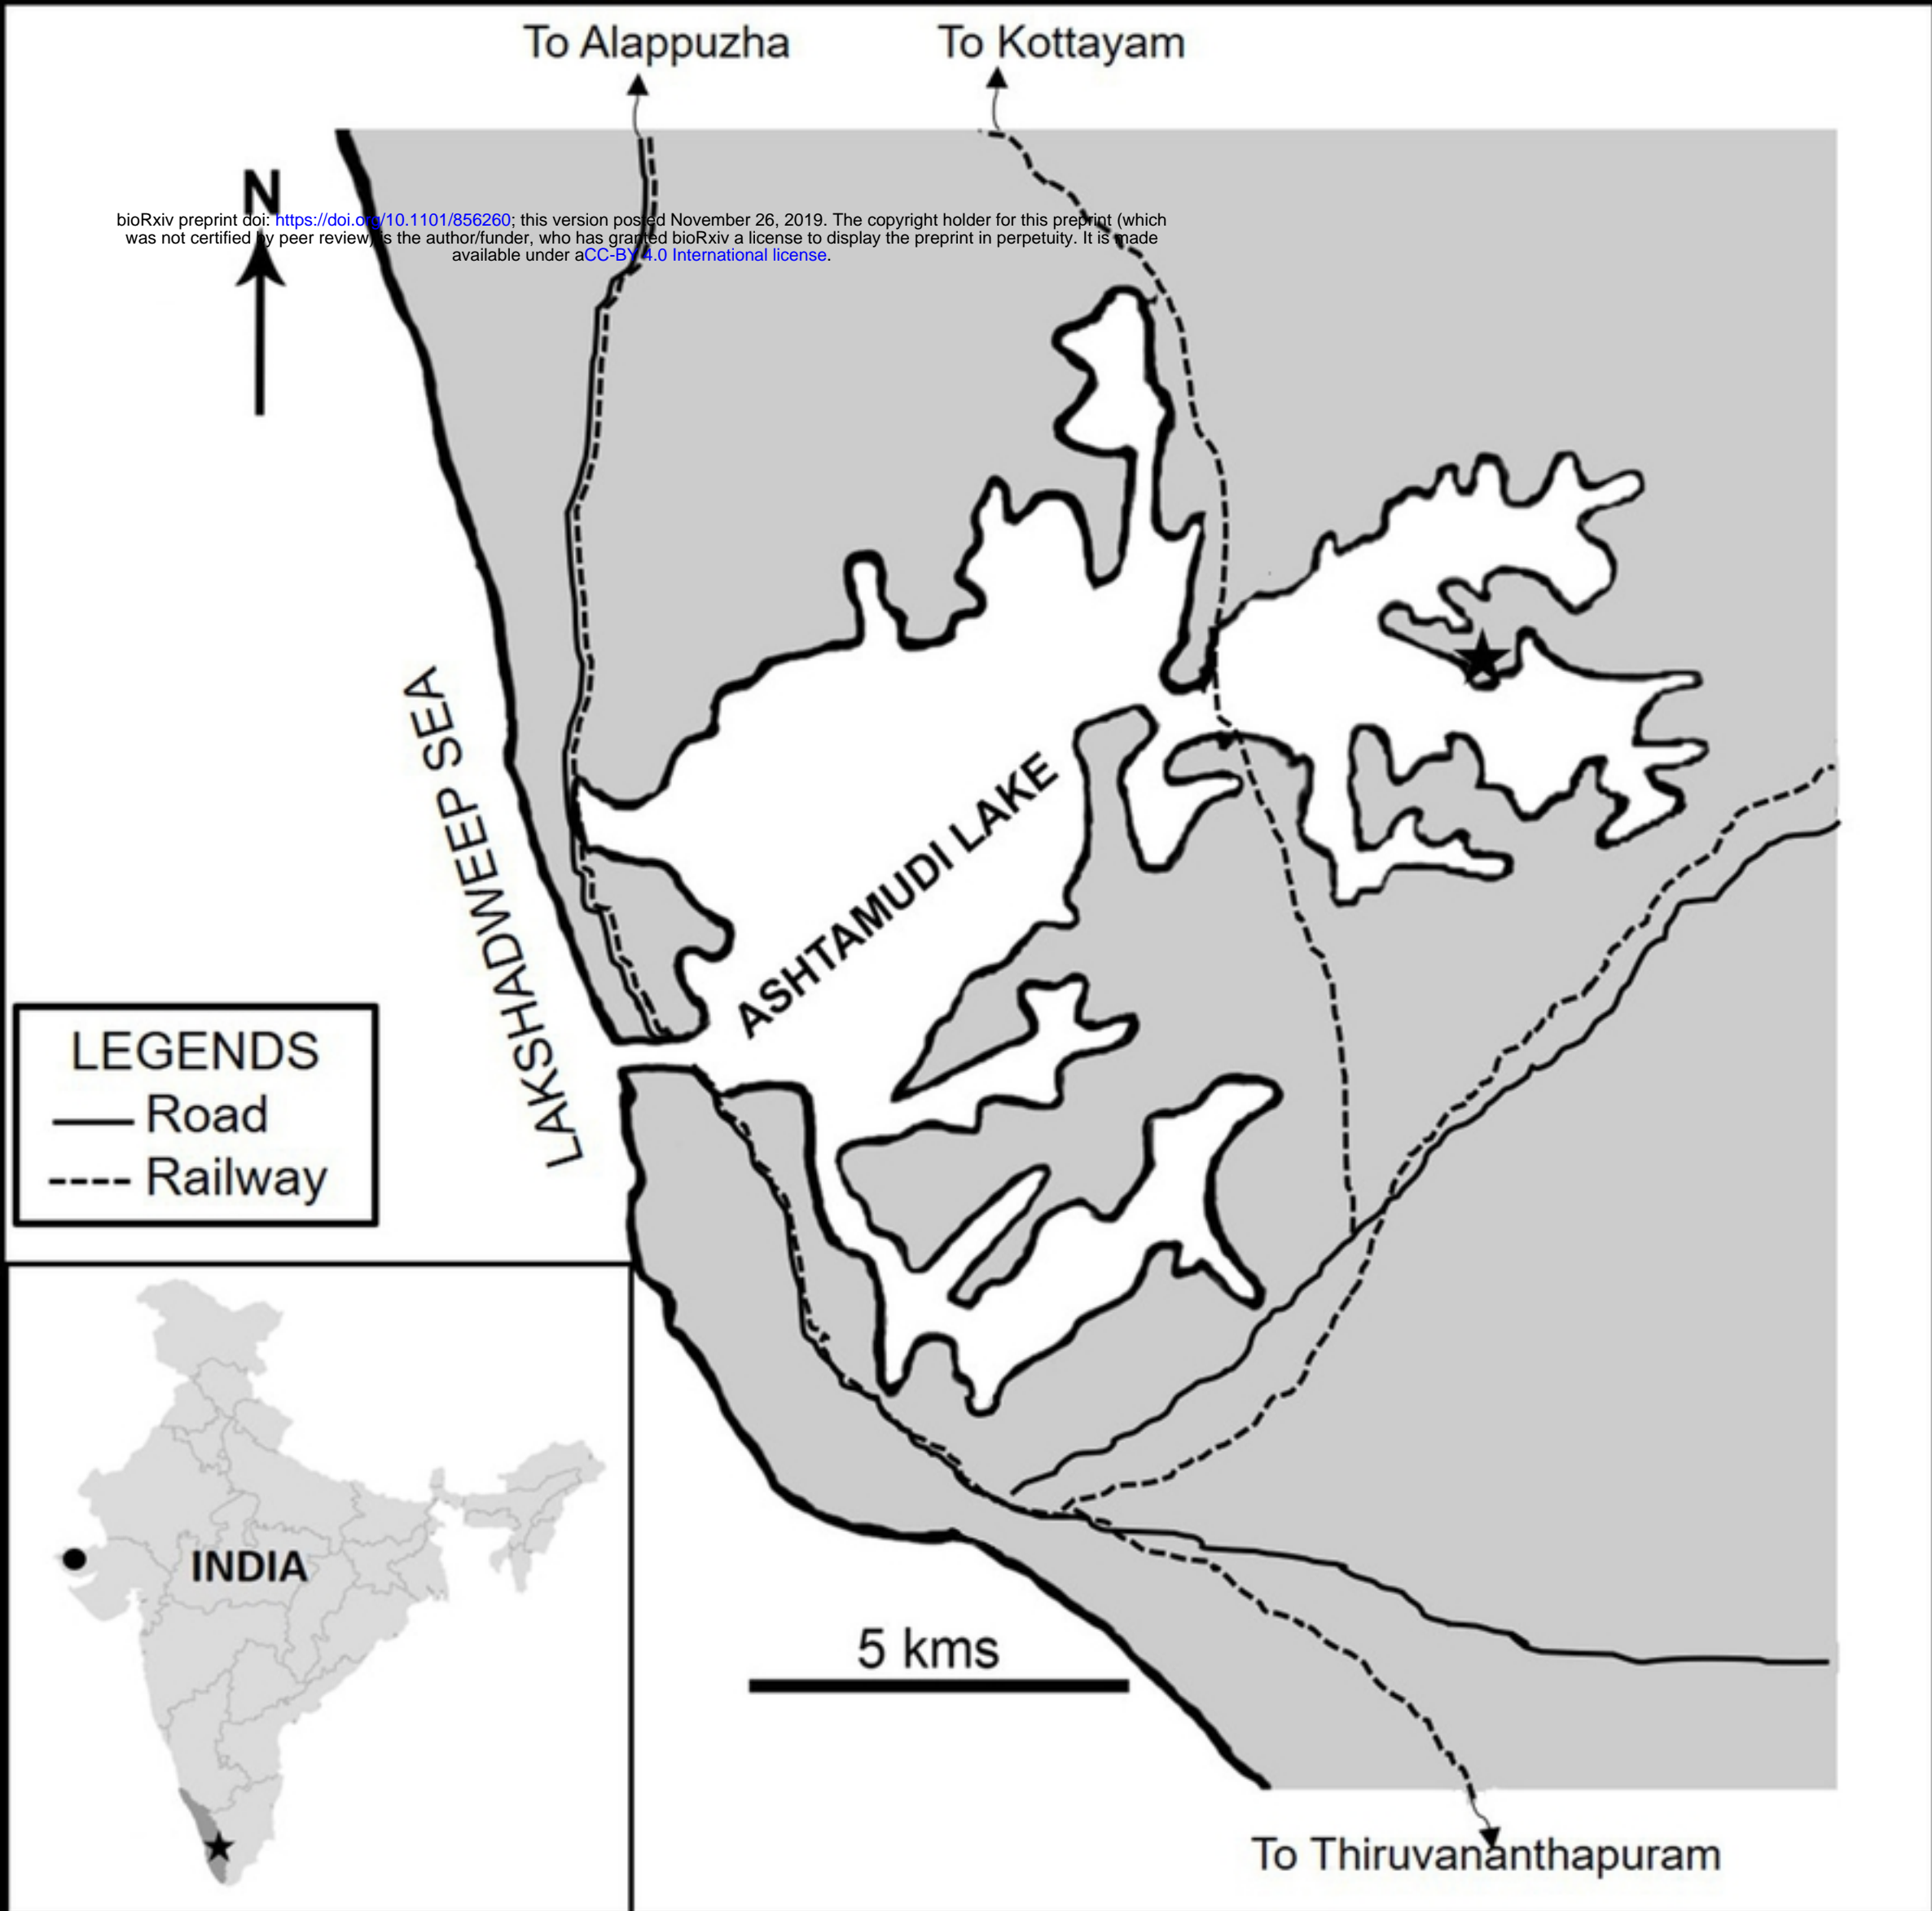

Figure 1



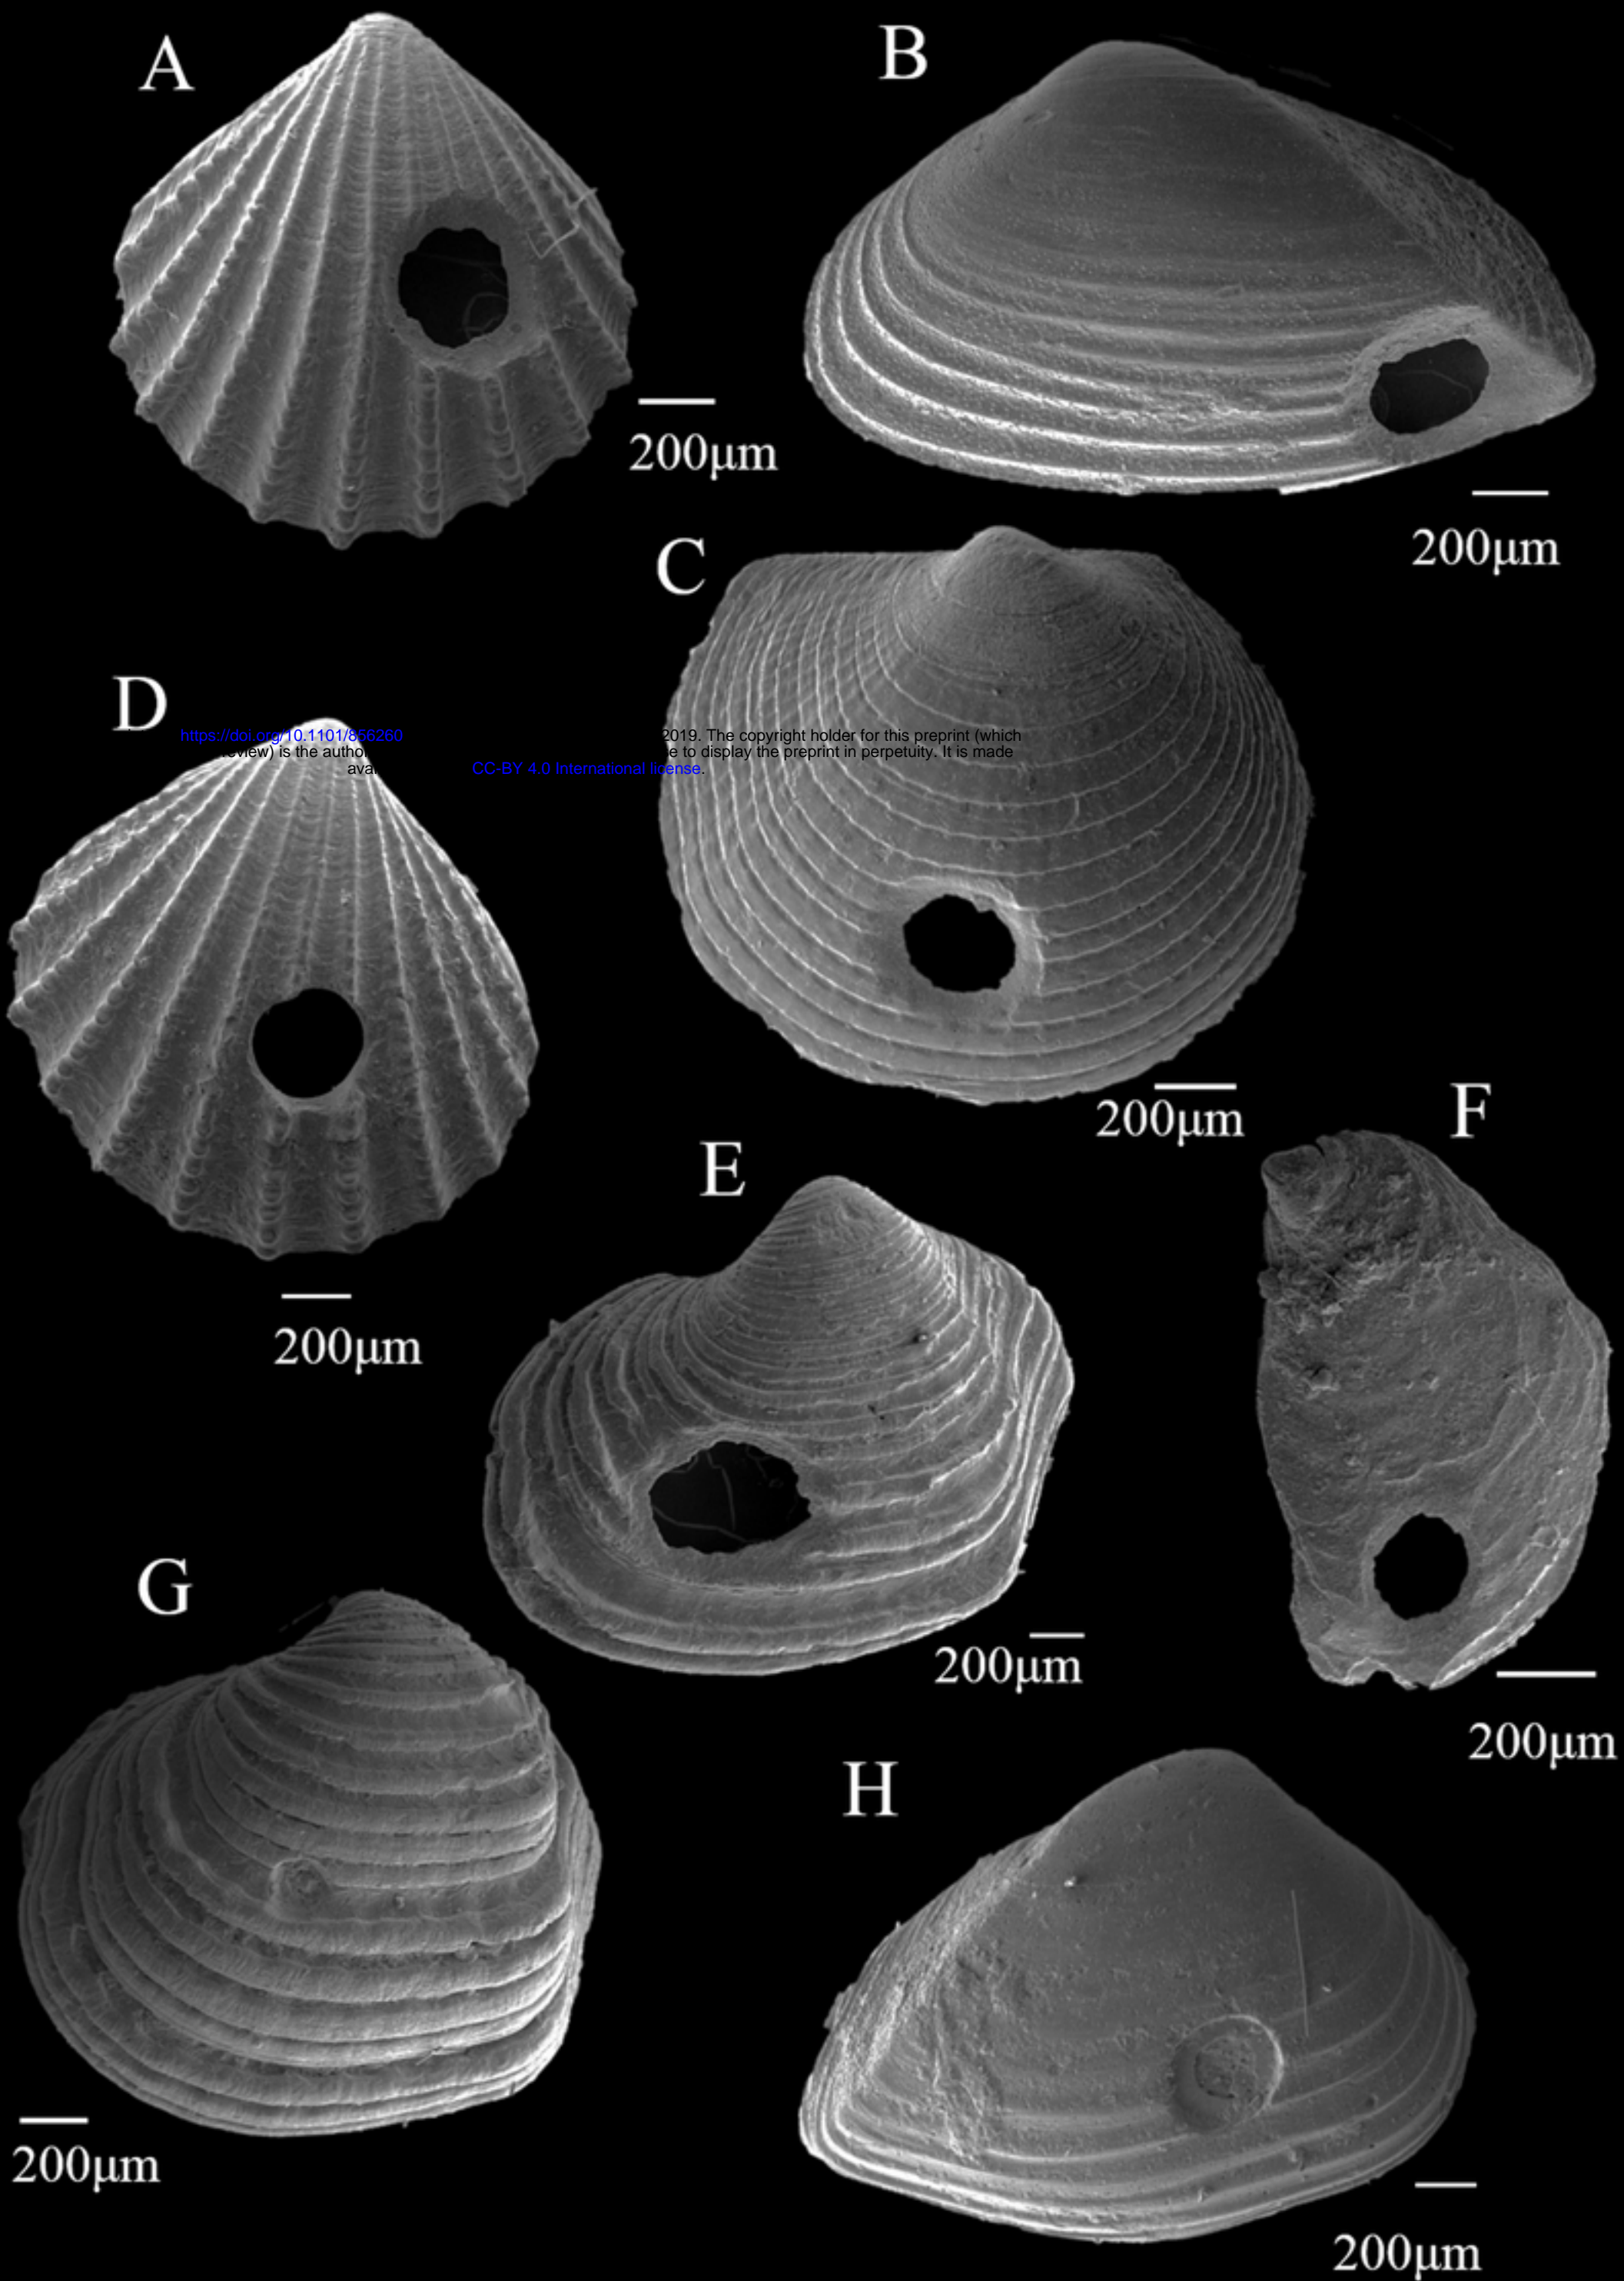

Figure 2

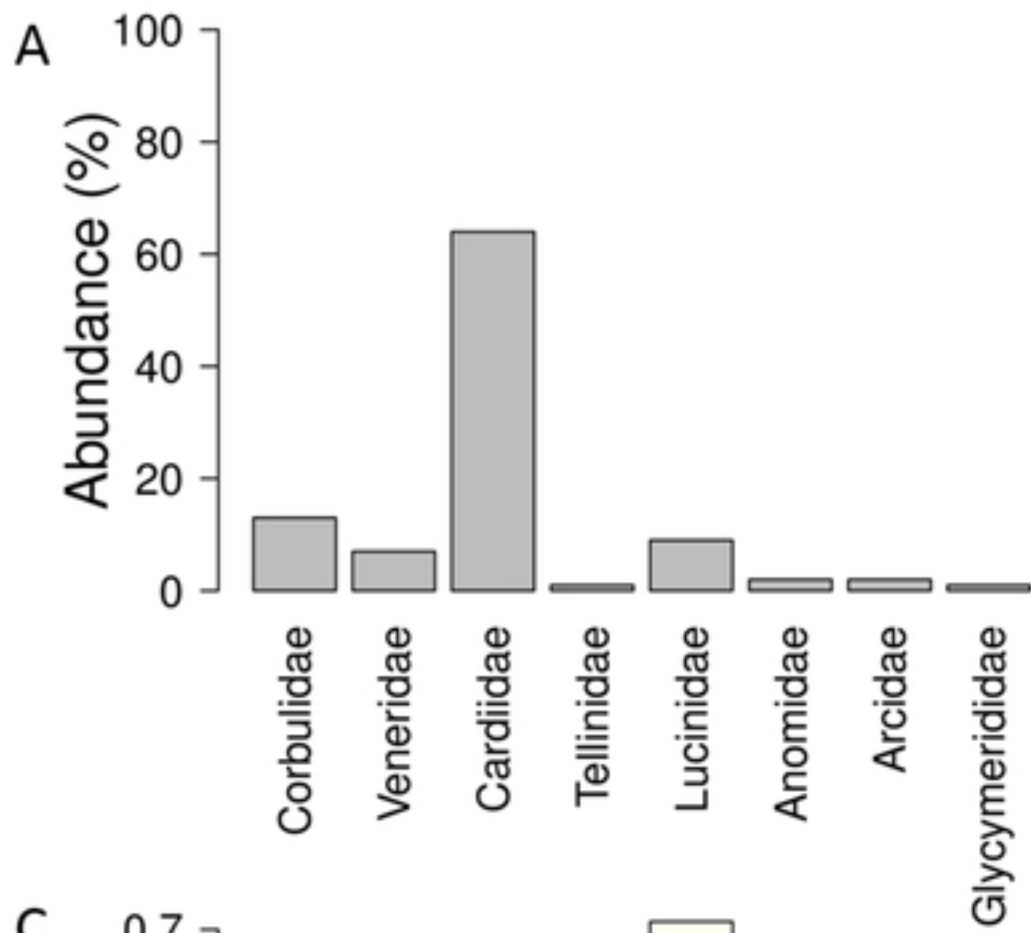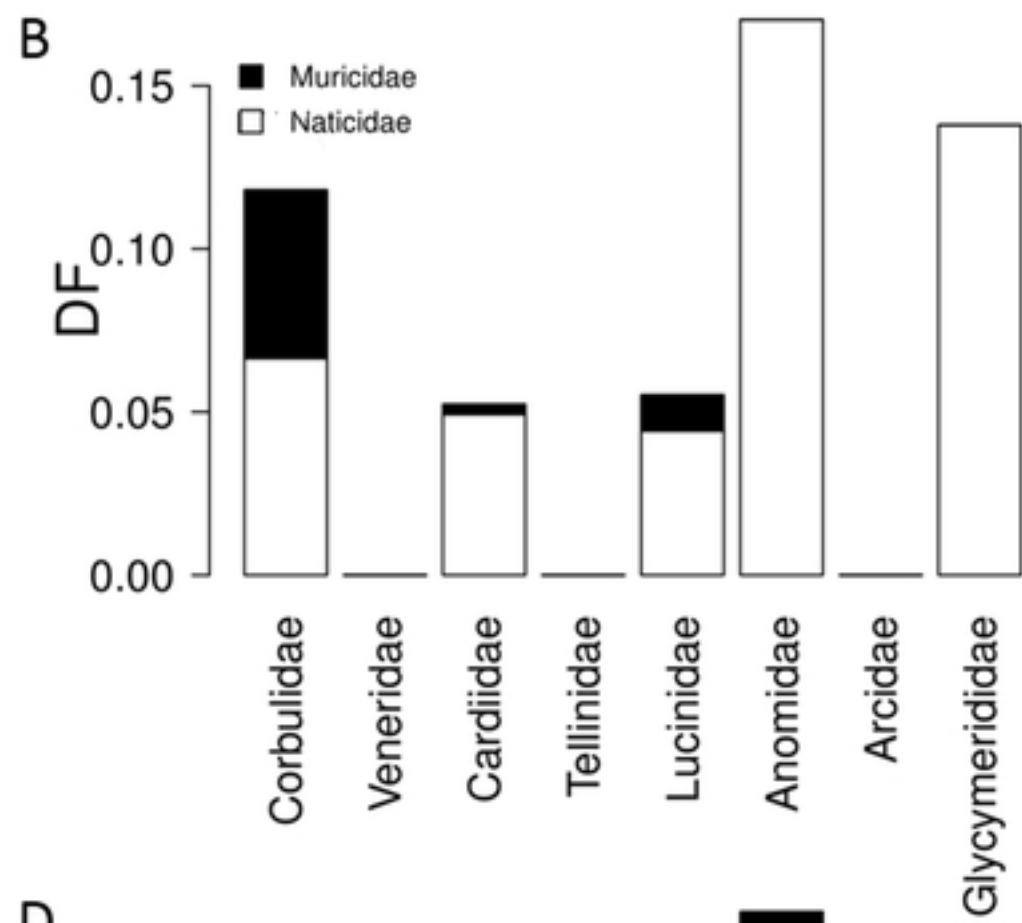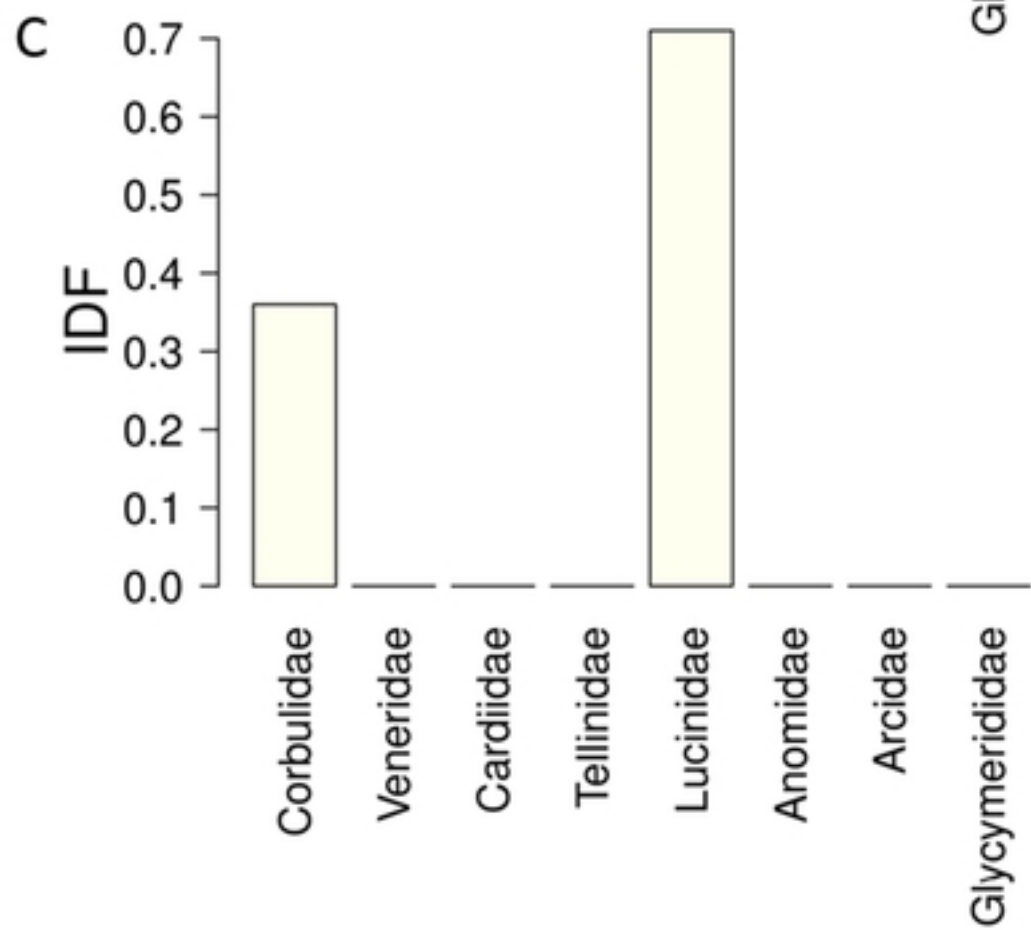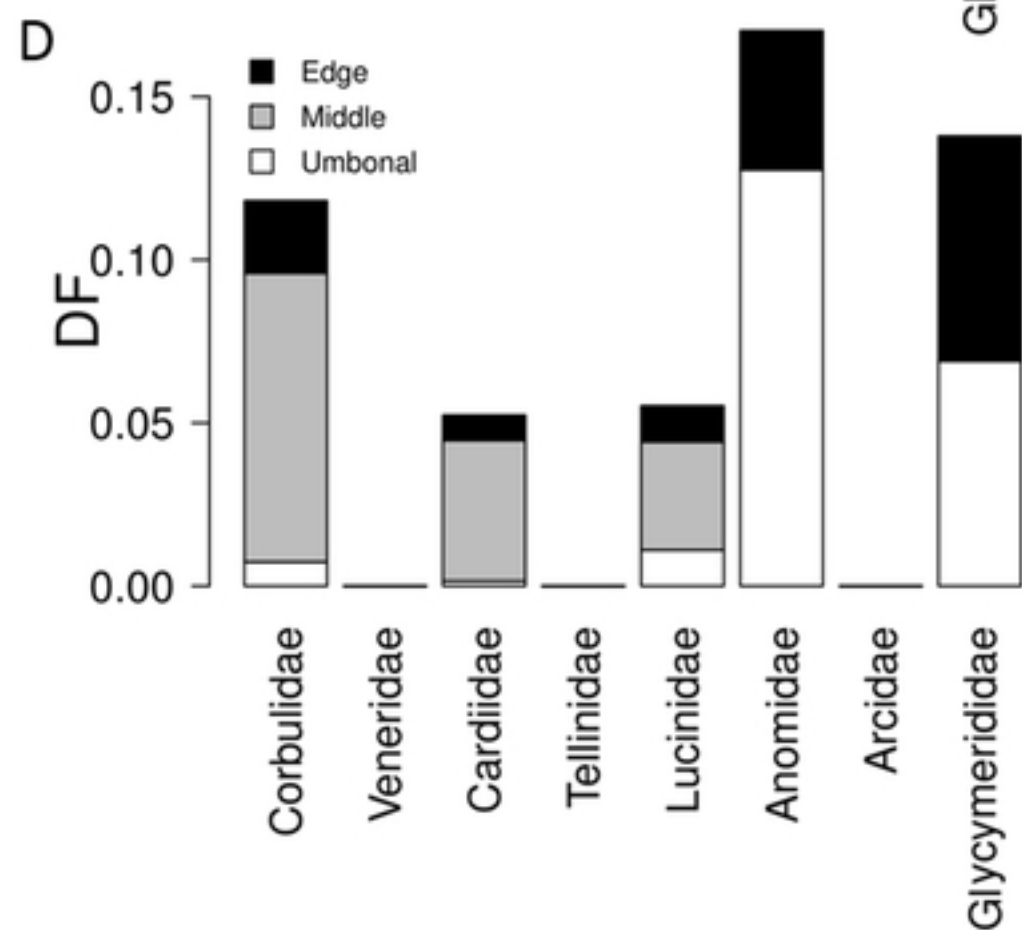

Figure 3

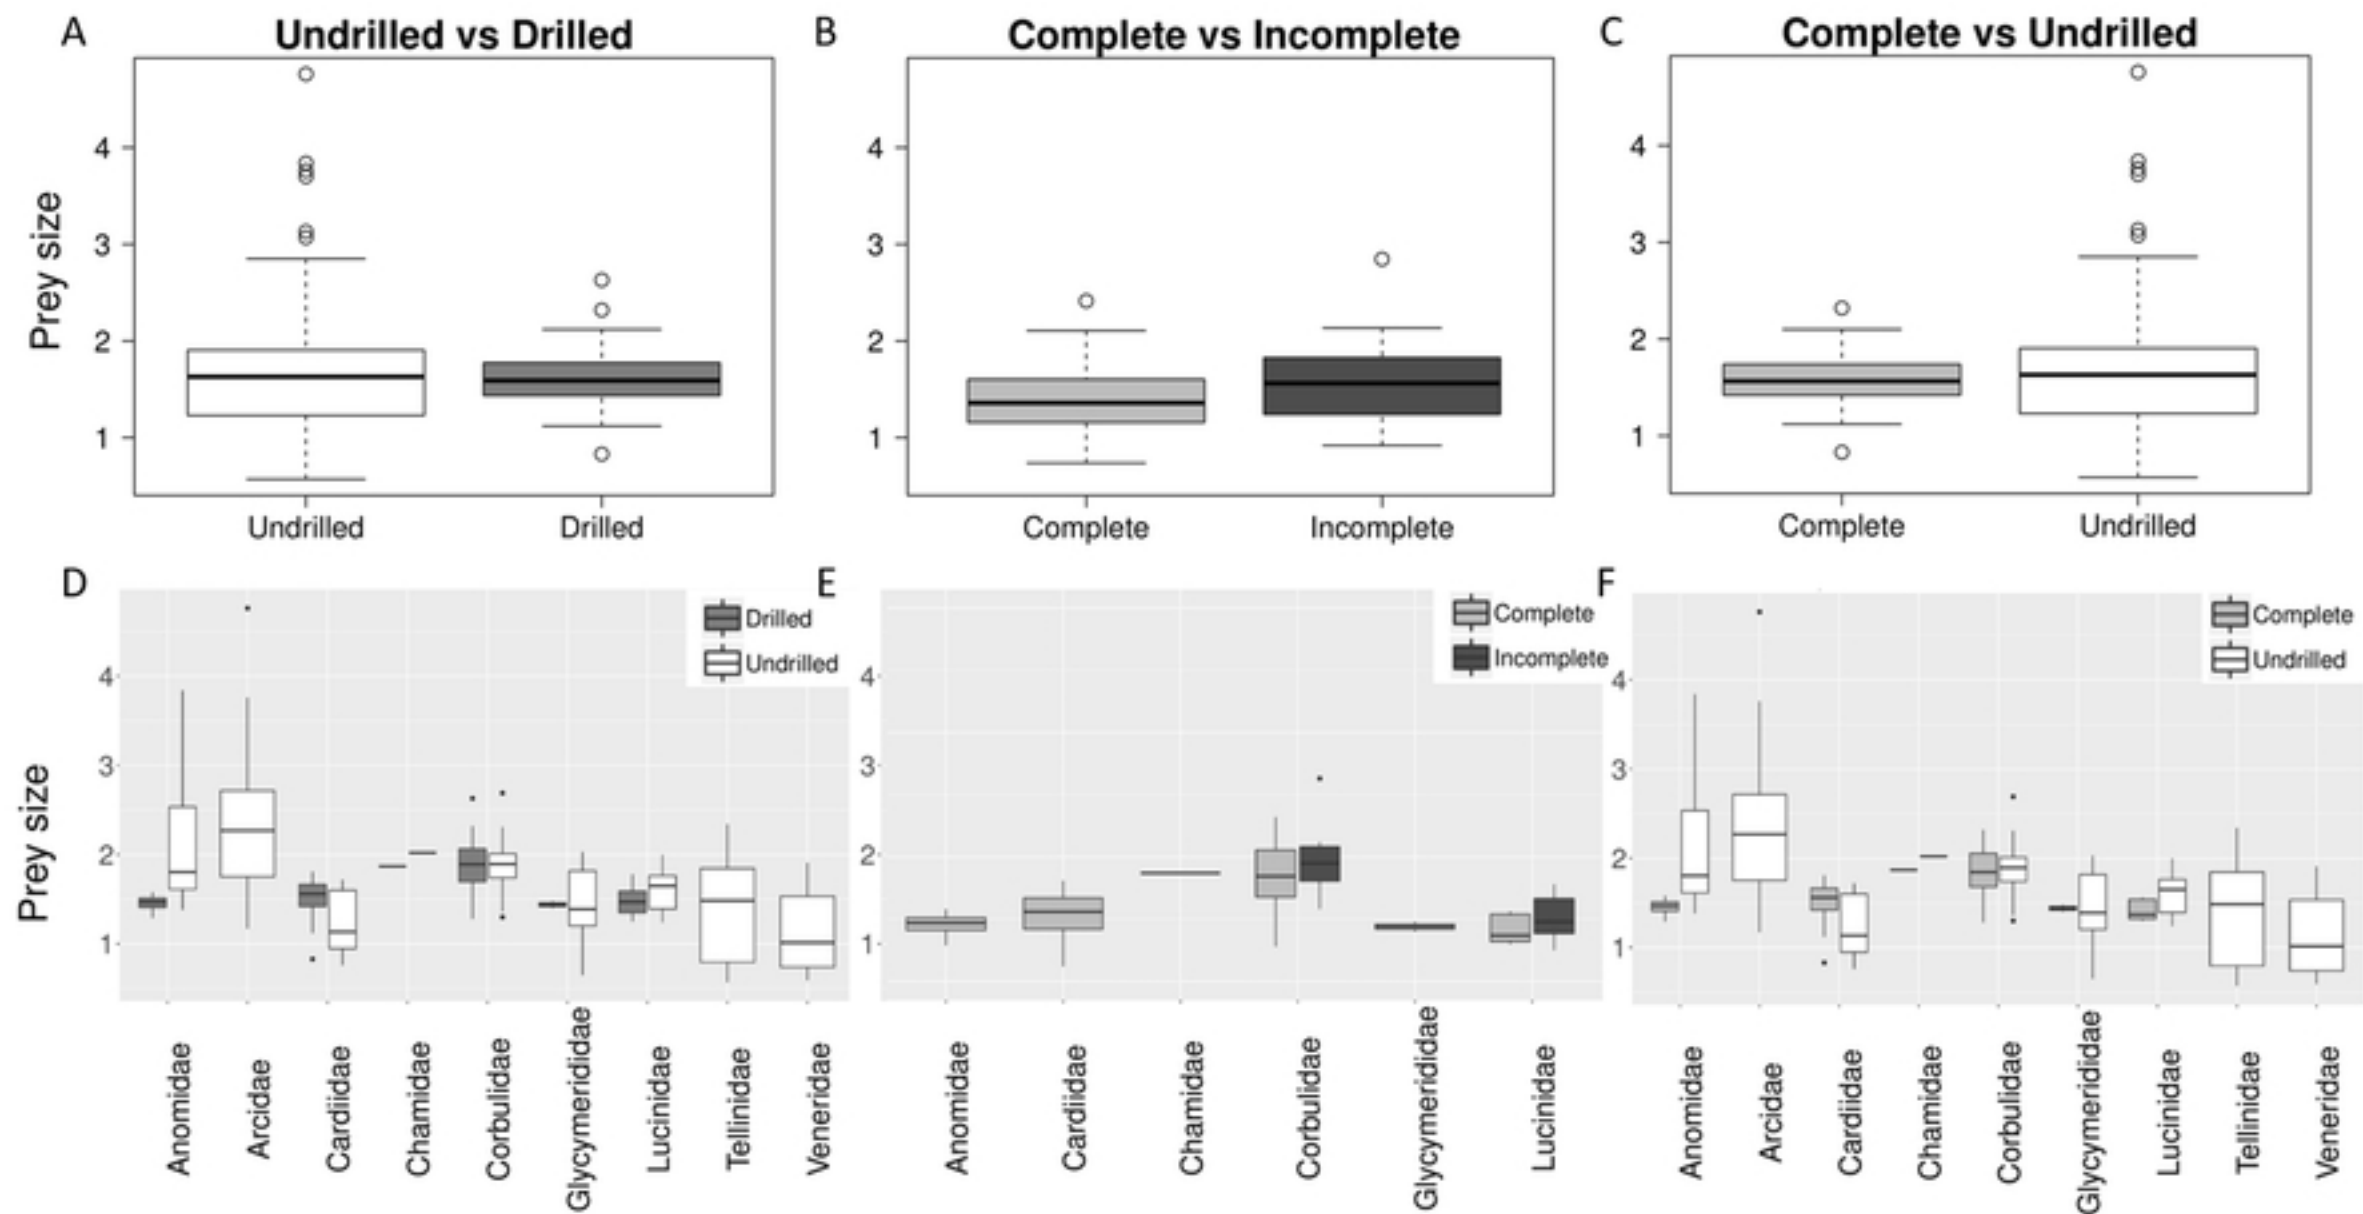

Figure 5

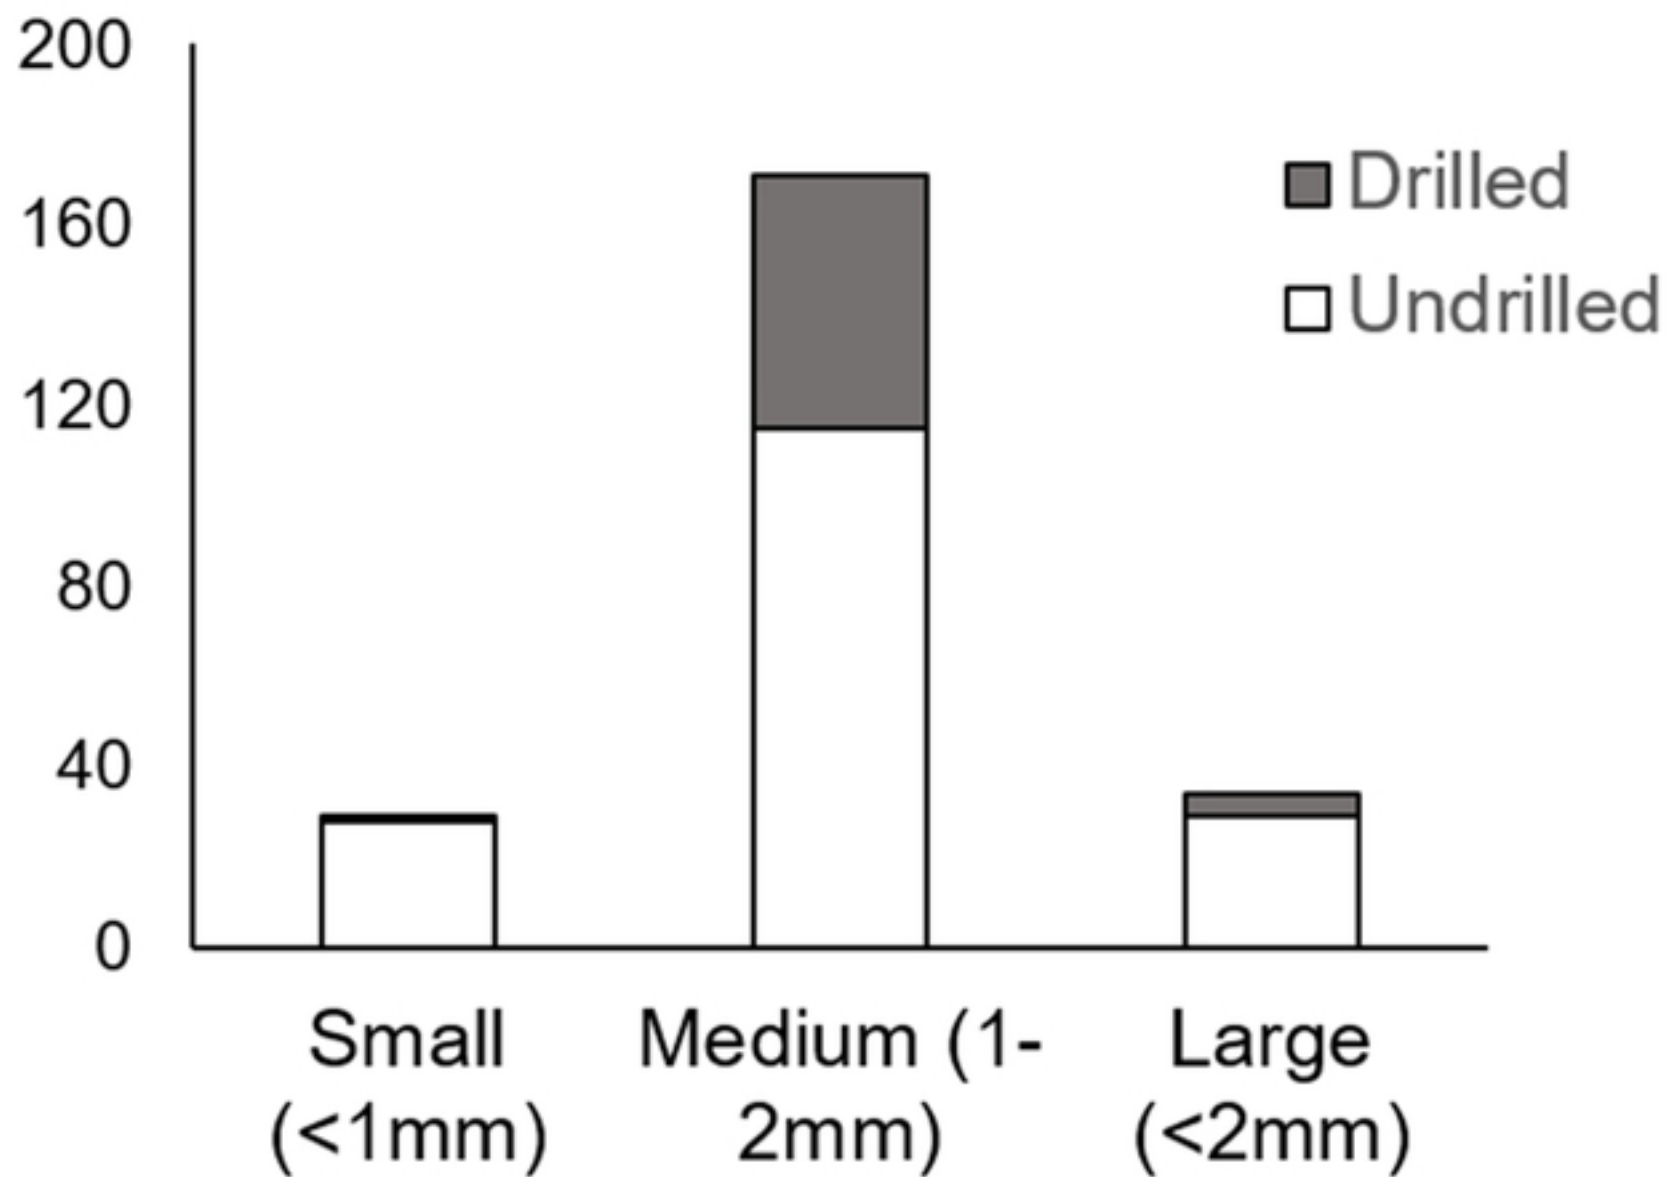

Figure 6

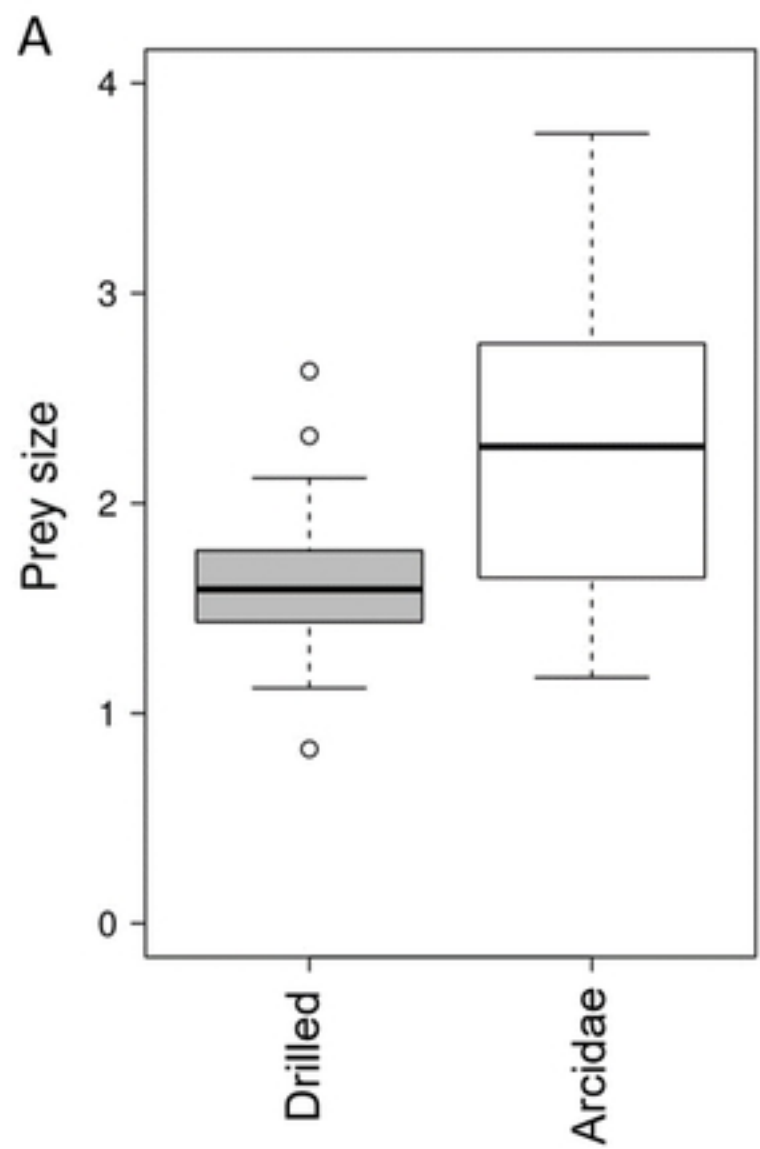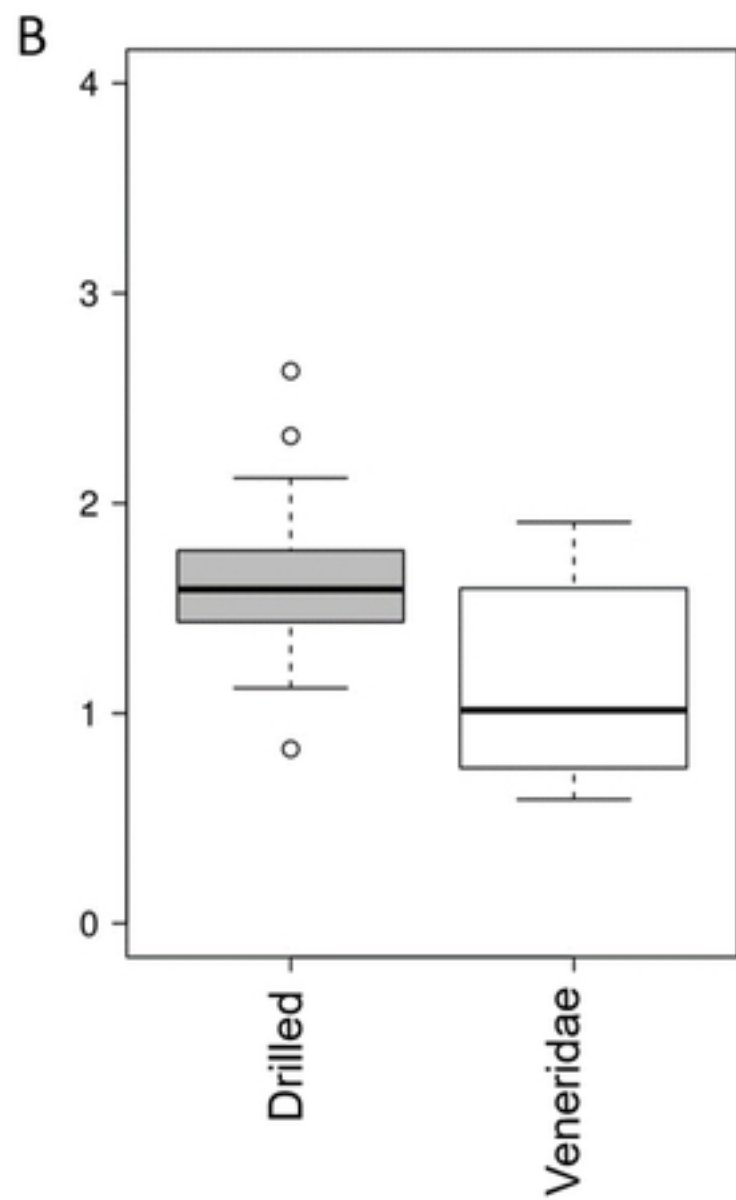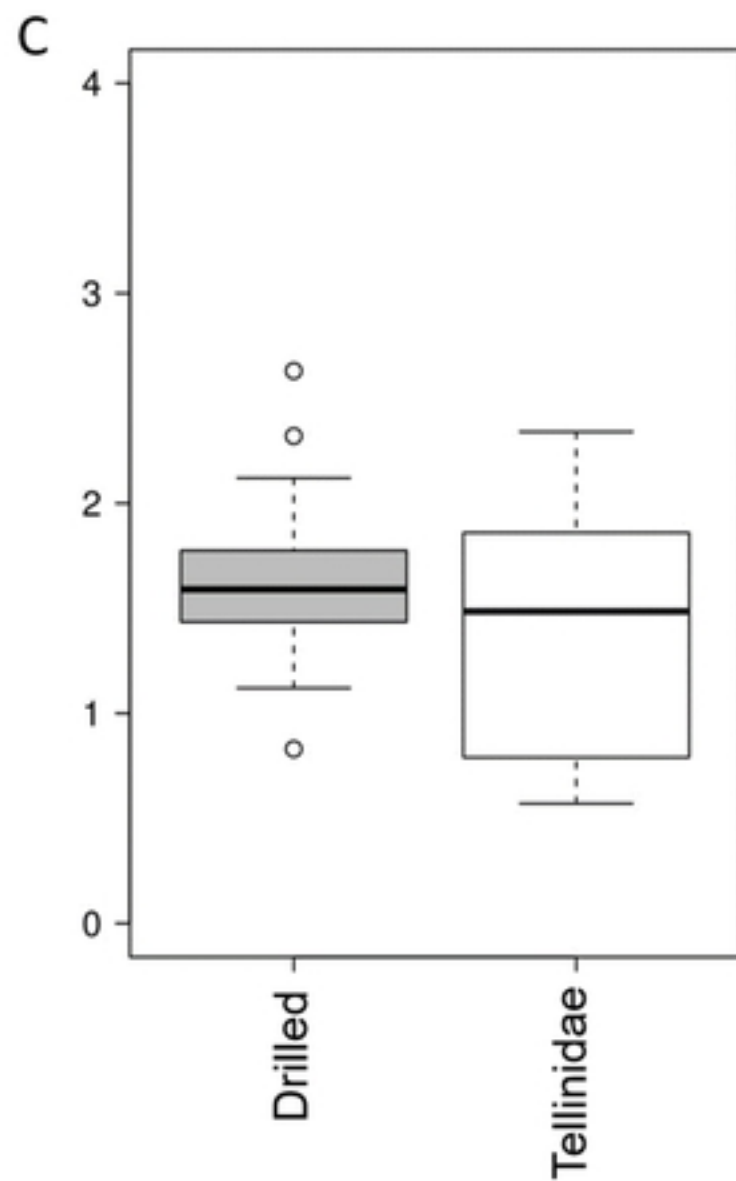

Figure 7



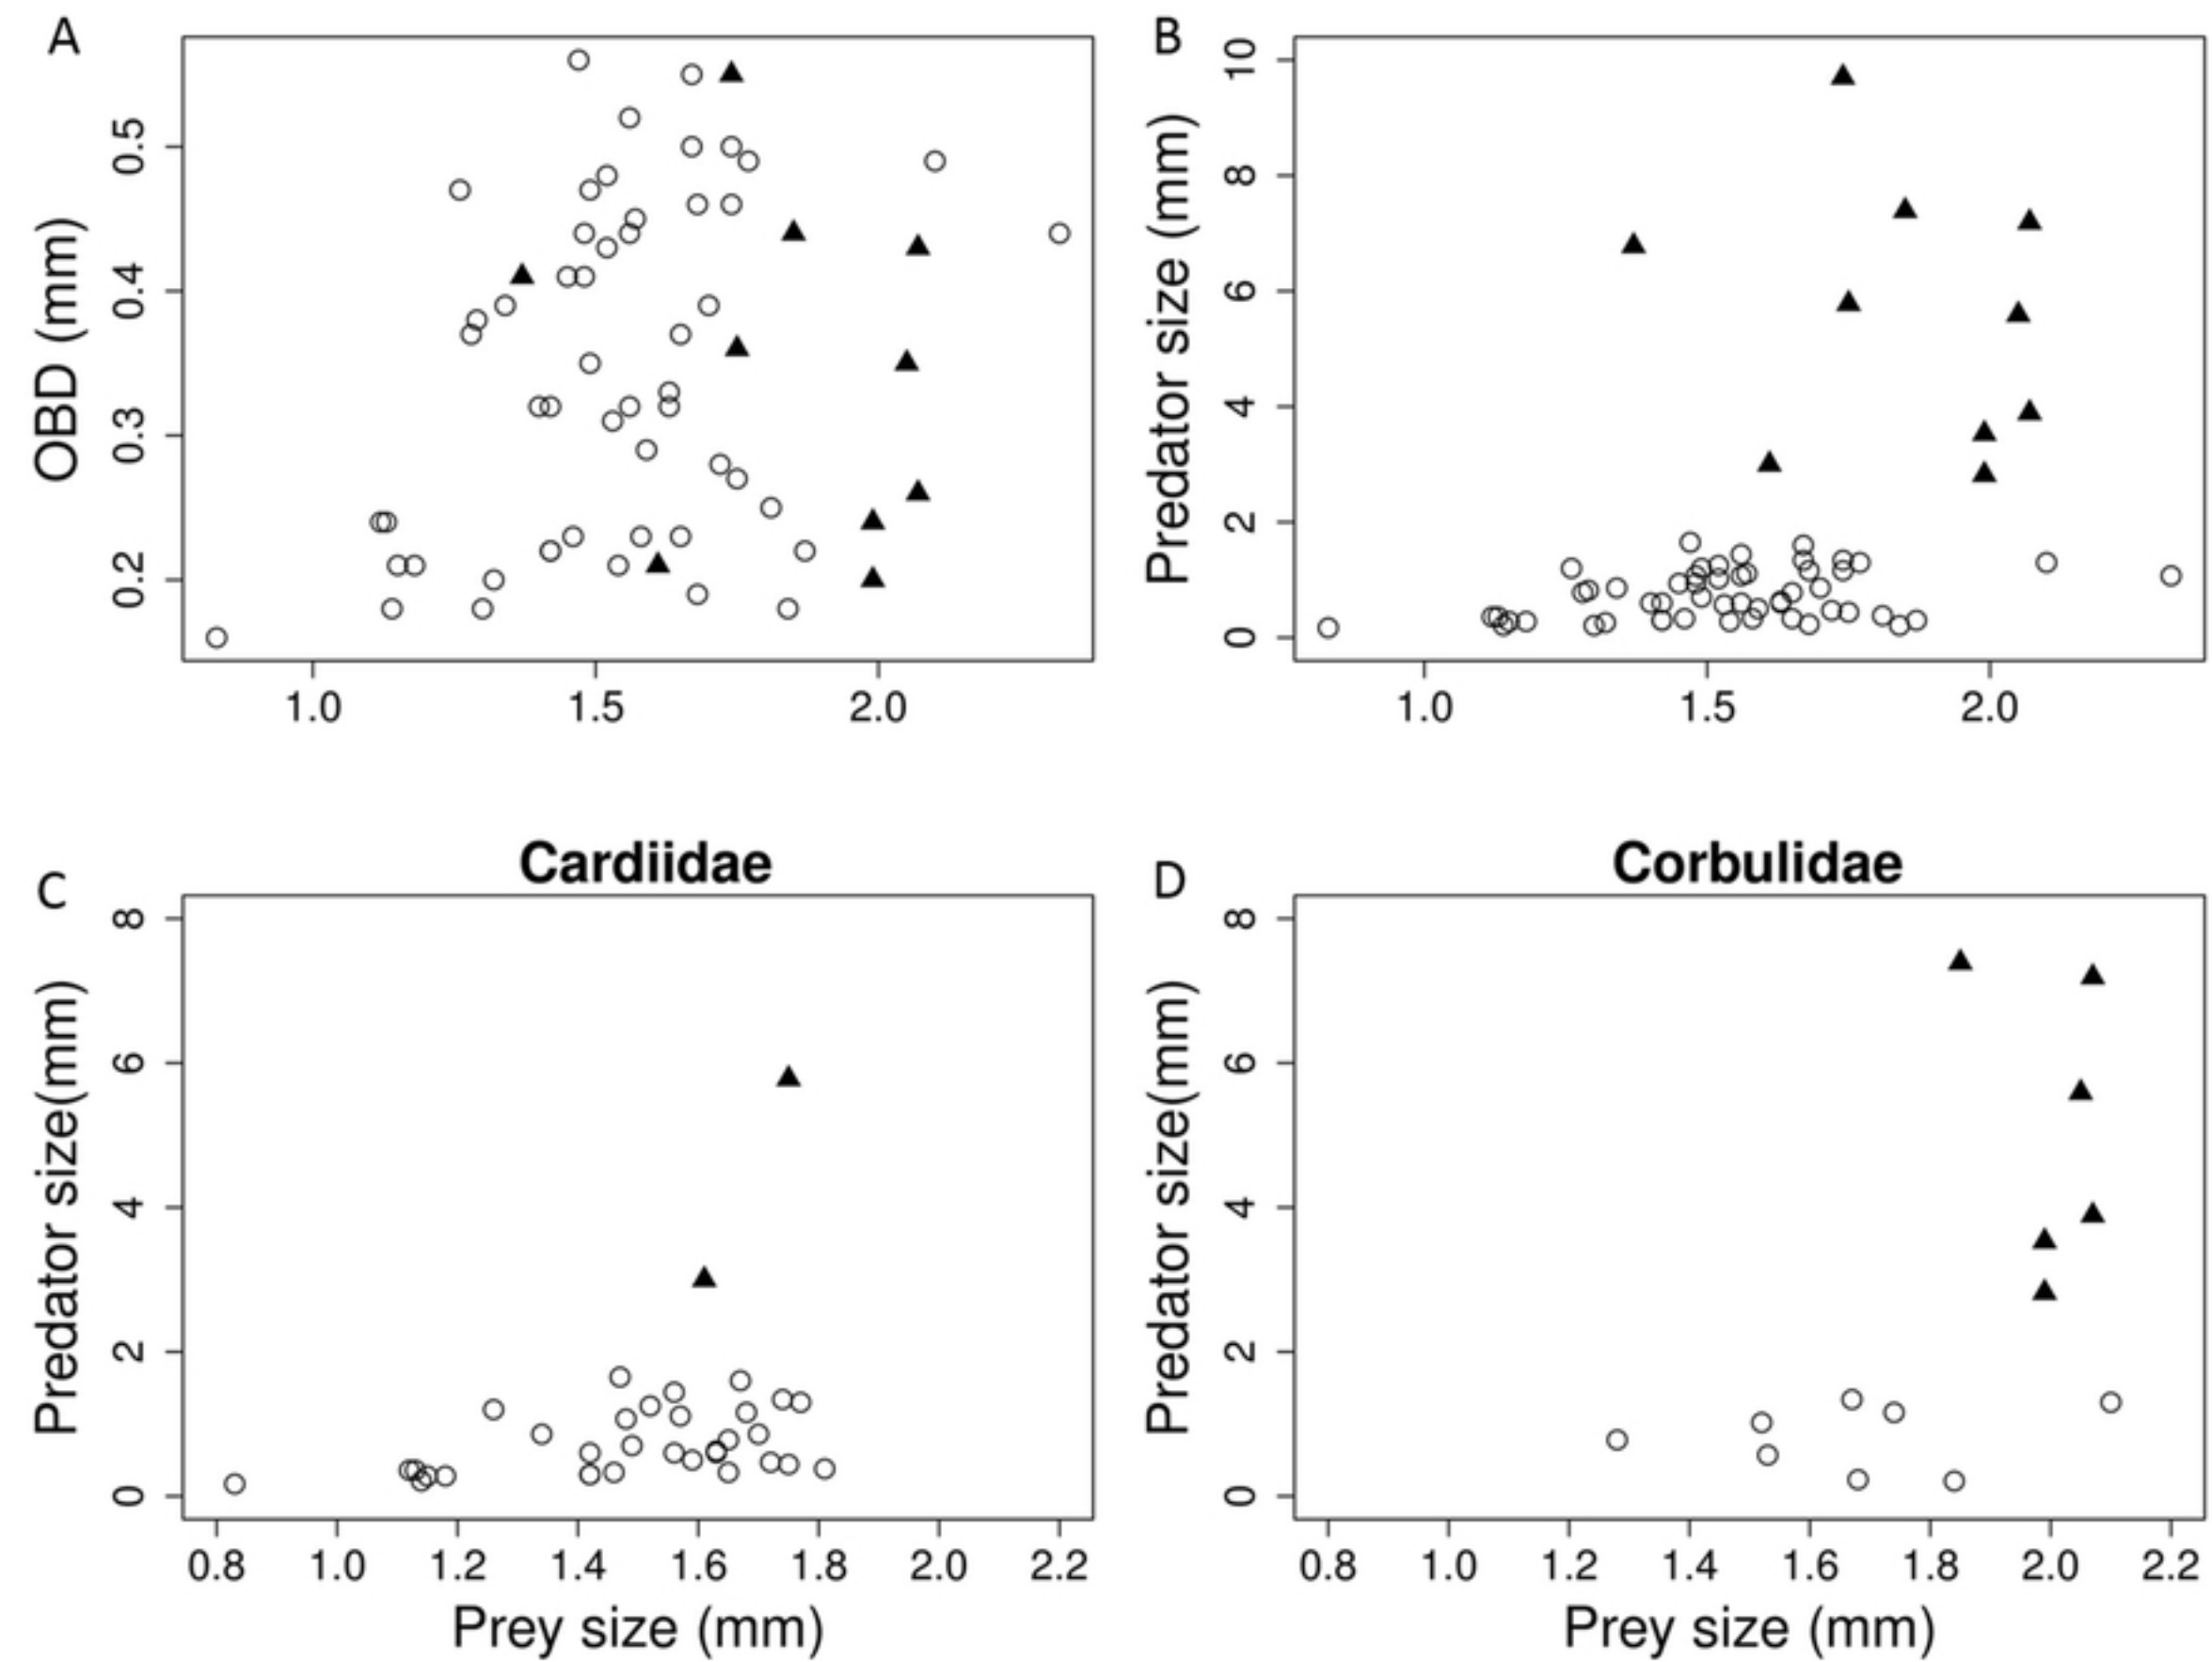

Figure 8

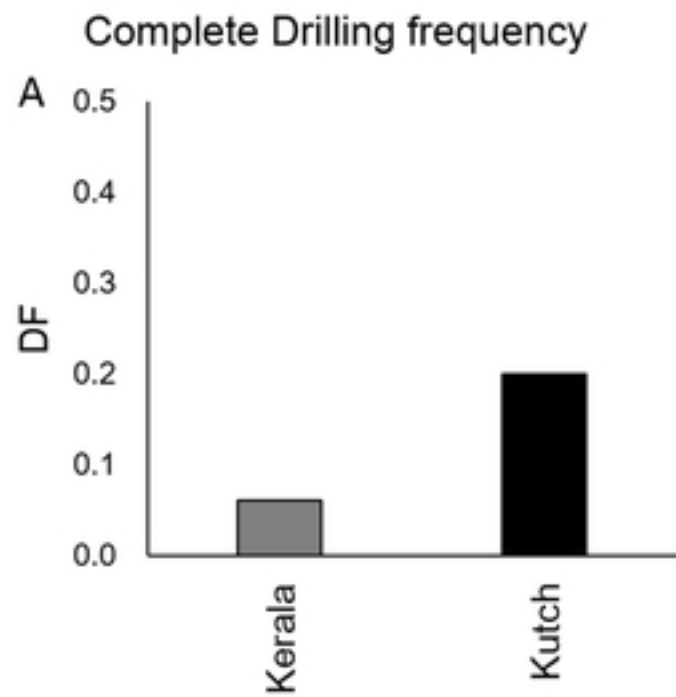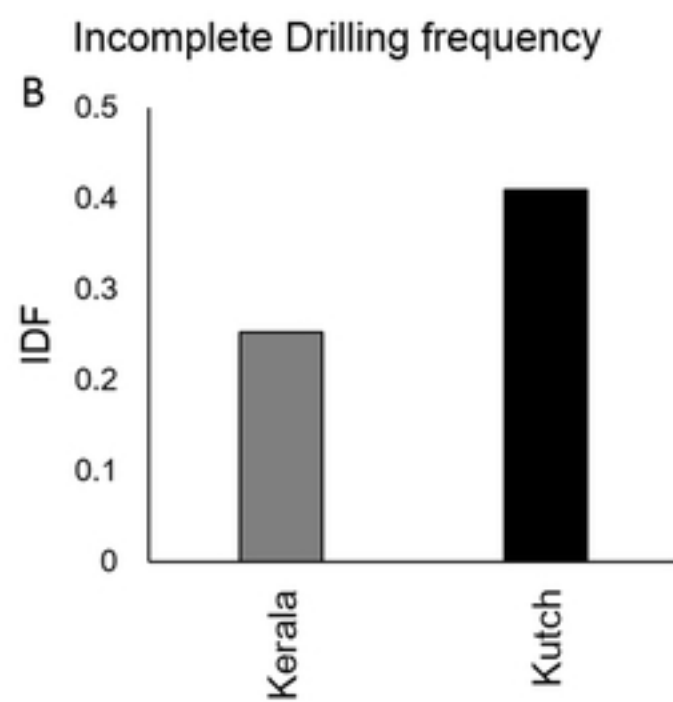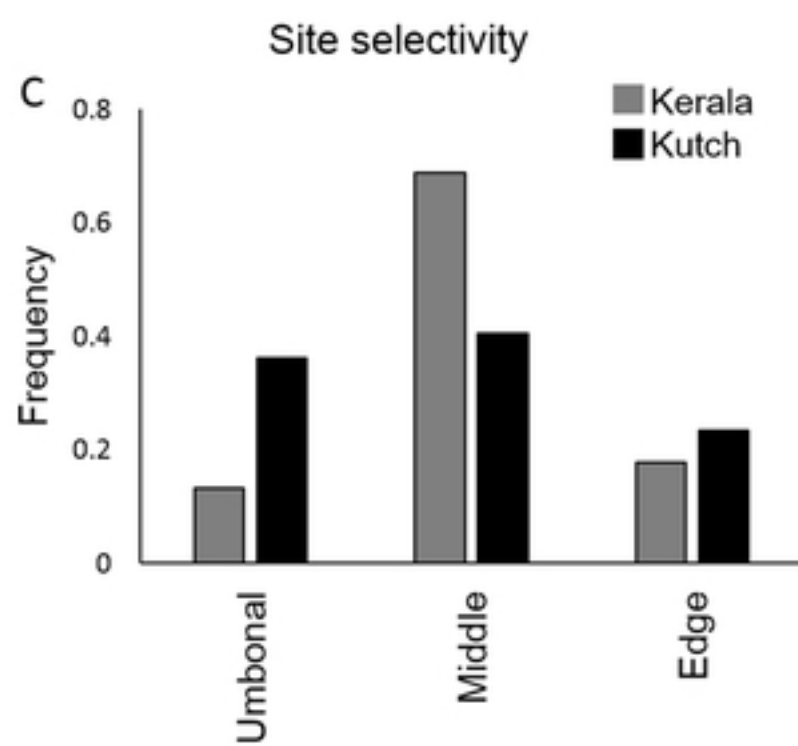

Figure 9

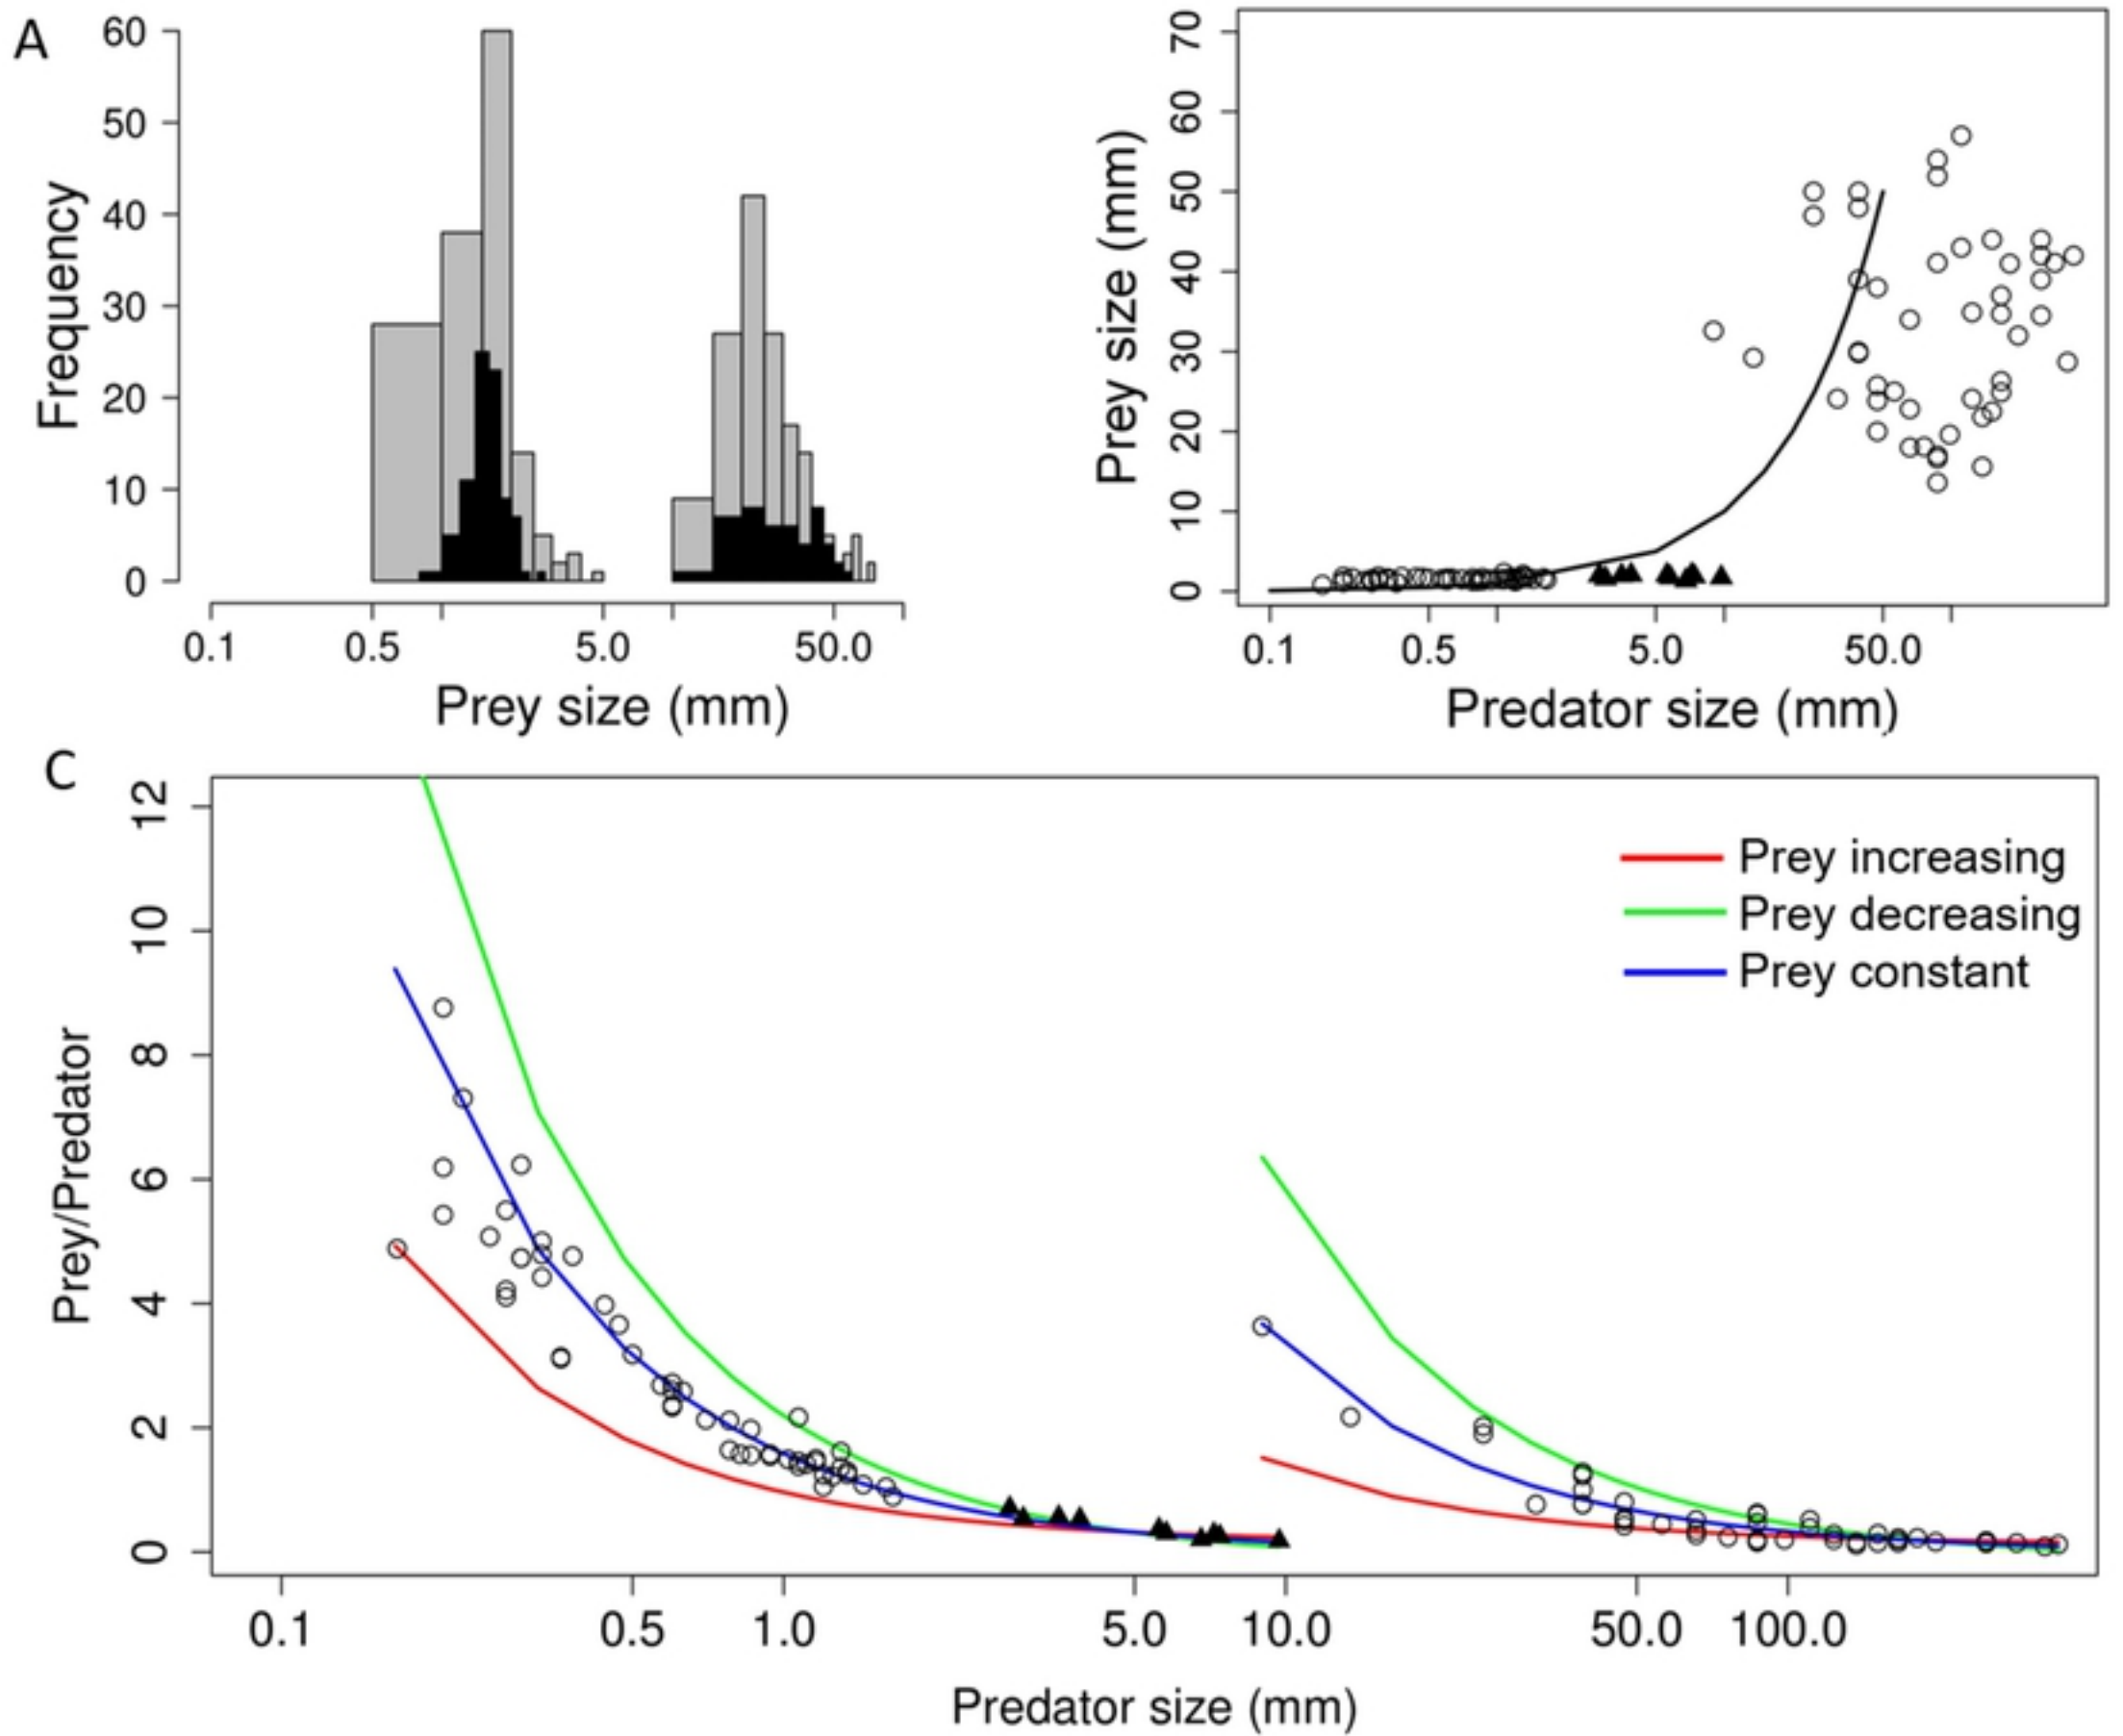

Figure 10

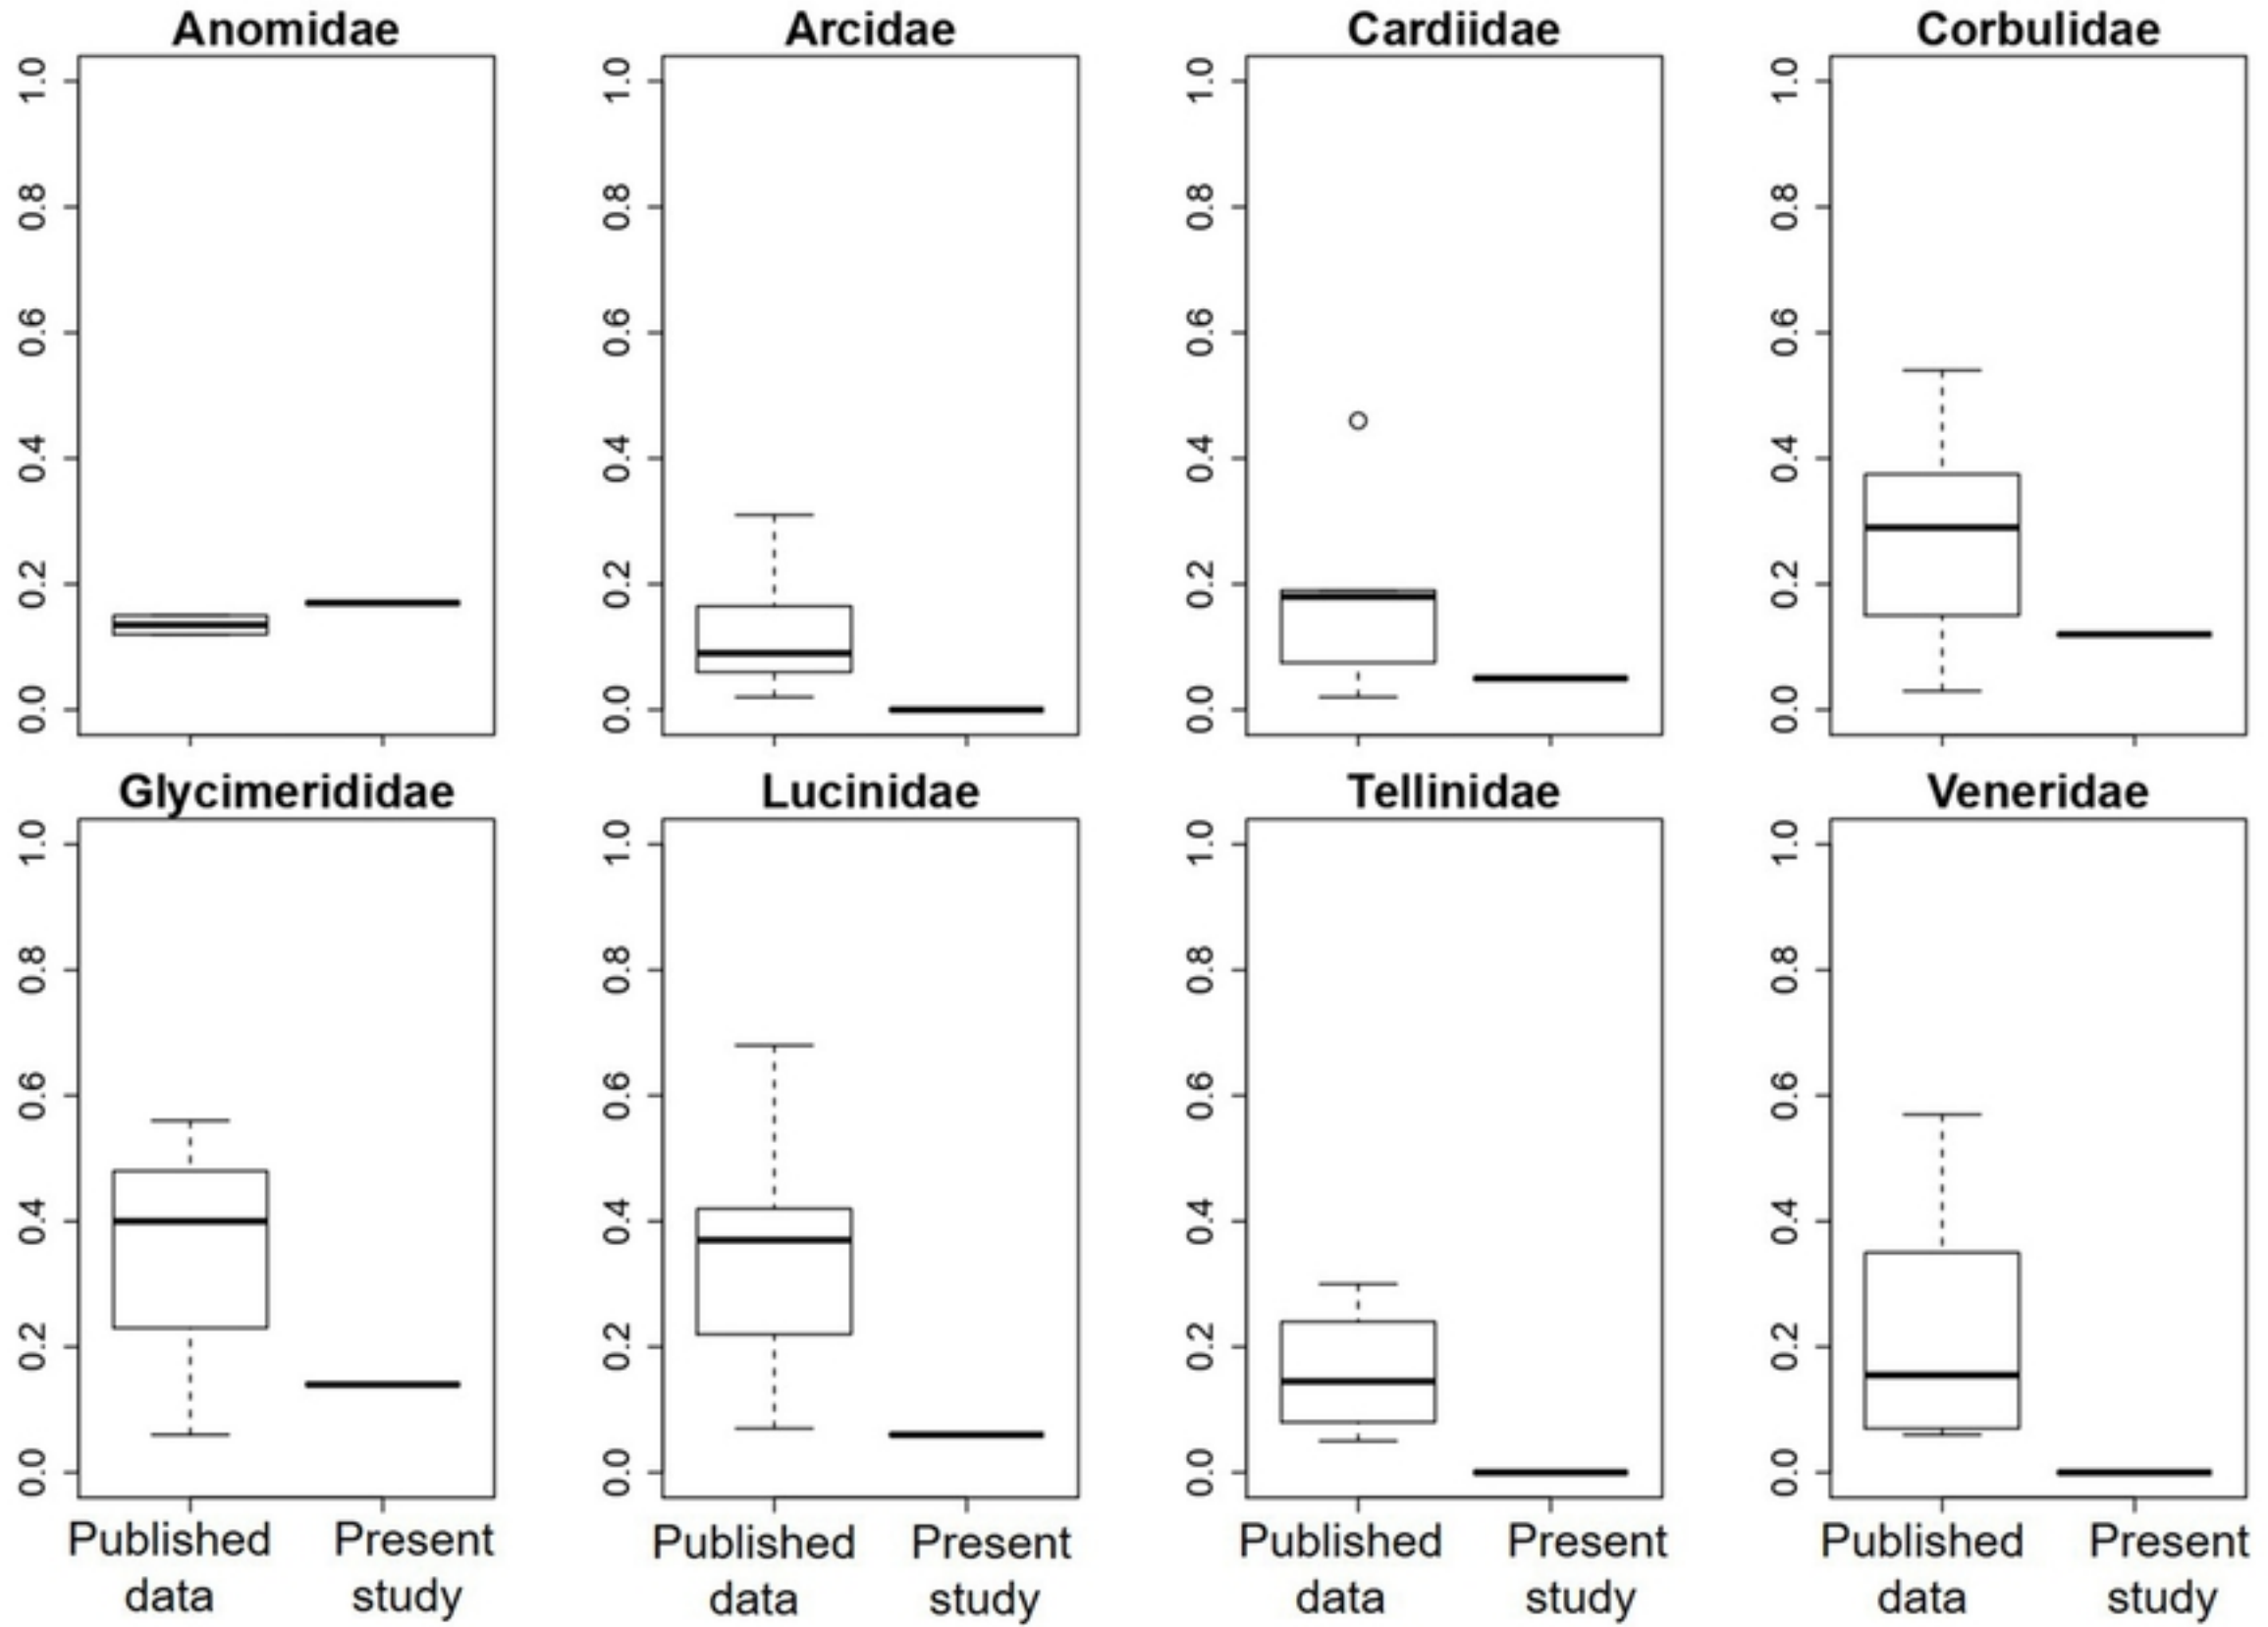

Figure 11

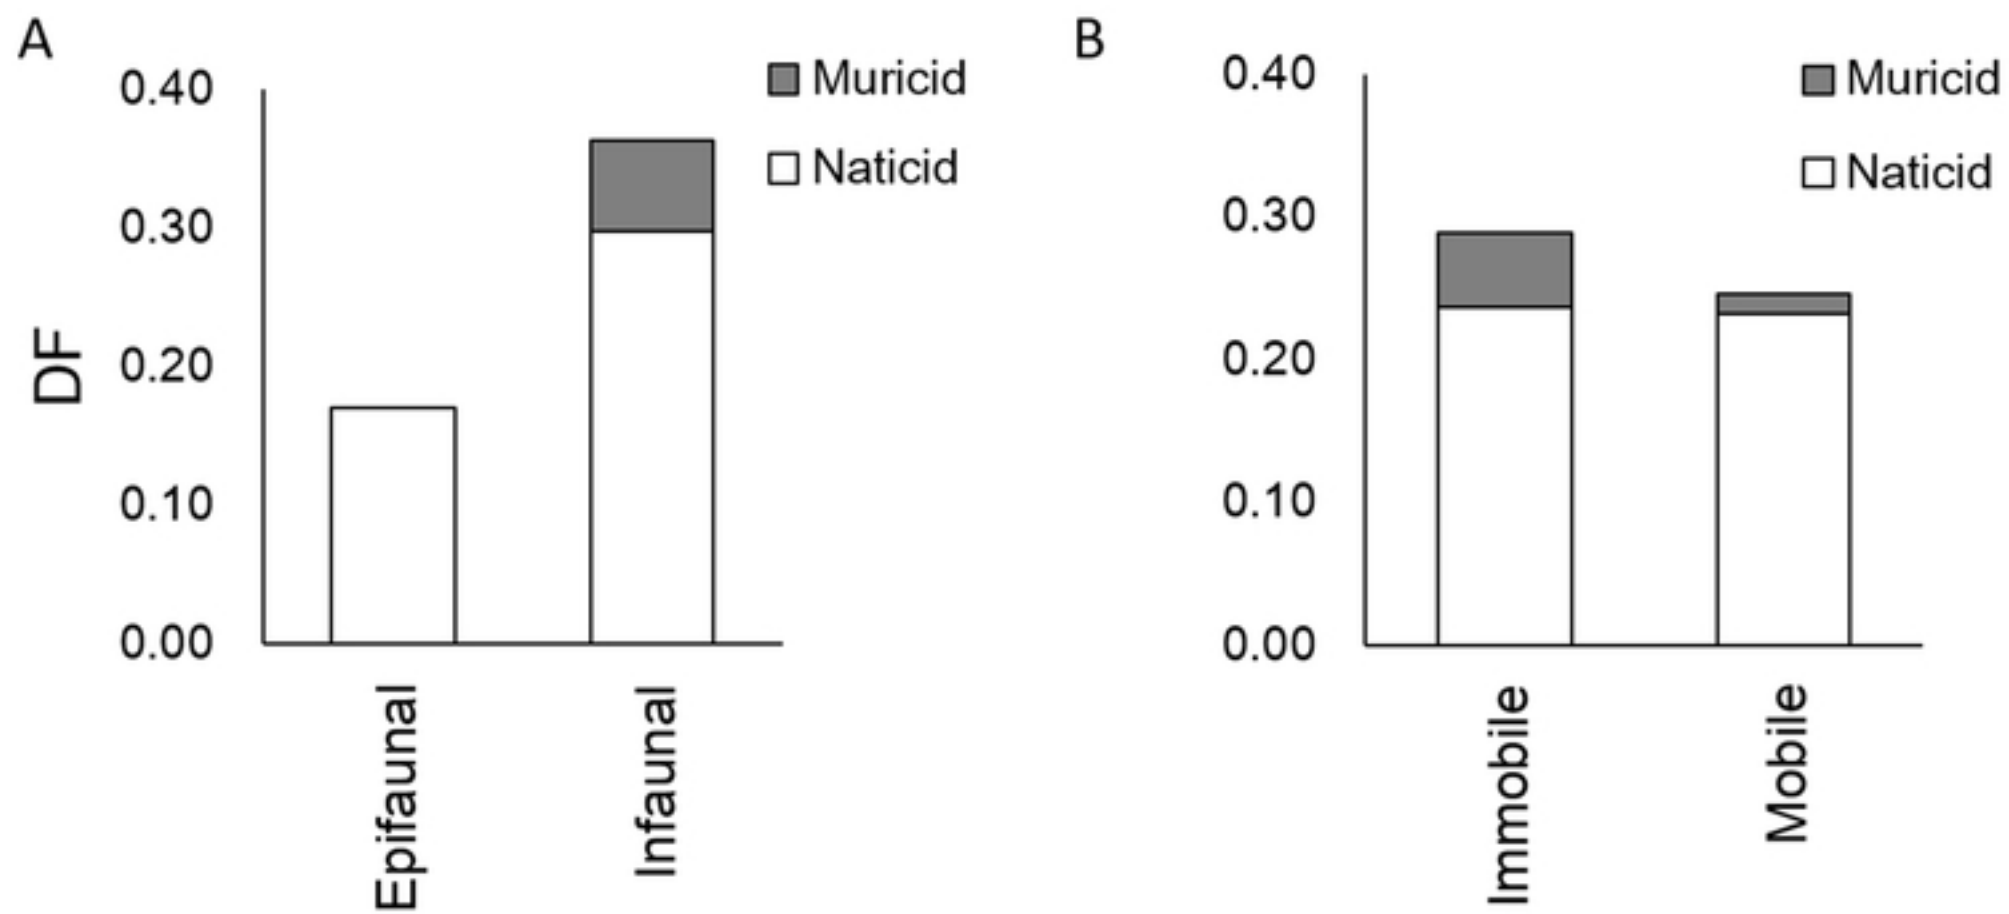

Figure 4
